# Supplementary material for: Dexamethasone in hospitalised COVID-19 patients not on intensive respiratory support
Source: PubMed Central journal article supplement — Eur Respir J. 2022 Jul 14;60(1):2102532. doi: 10.1183/13993003.02532-2021 (PMC8841623; doi:10.1183/13993003.02532-2021), 2022-07-14

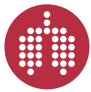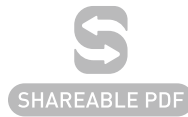

# Dexamethasone in hospitalised COVID-19 patients not on intensive respiratory support

Kristina Crothers<sup>1,2</sup>, Rian DeFaccio<sup>1</sup>, Janet Tate<sup>3</sup>, Patrick R. Alba<sup>4</sup>, Matthew Bidwell Goetz<sup>5</sup>, Barbara Jones<sup>6</sup>, Joseph T. King Jr<sup>3</sup>, Vincent Marconi<sup>6</sup>, Michael E. Ohl<sup>7</sup>, Christopher T. Rentsch<sup>8</sup>, Maria C. Rodriguez-Barradas<sup>9</sup>, Shahida Shahrir<sup>2</sup>, Amy C. Justice<sup>3,10</sup> and Kathleen M. Akgün<sup>3</sup> for the Veterans Aging Cohort Study Clinical COVID-19 Working Group

<sup>1</sup>VA Puget Sound Health Care System, Seattle, WA, USA. <sup>2</sup>Dept of Medicine, University of Washington, Seattle, WA, USA. <sup>3</sup>VA Connecticut Health Care System and Yale University School of Medicine, New Haven, CT, USA. <sup>4</sup>VA Salt Lake City Health Care System and University of Utah School of Medicine, Salt Lake City, UT, USA. <sup>5</sup>VA Greater Los Angeles Healthcare System and David Geffen School of Medicine at UCLA, Los Angeles, CA, USA. <sup>6</sup>Atlanta VA Medical Center and Emory University, Atlanta, GA, USA. <sup>7</sup>Dept of Medicine, University of Iowa Carver College of Medicine, Iowa City, IA, USA. <sup>8</sup>Faculty of Epidemiology and Population Health, London School of Hygiene and Tropical Medicine, London, UK. <sup>9</sup>Michael E. DeBakey VA Medical Center and Baylor College of Medicine, Houston, TX, USA. <sup>10</sup>Yale School of Public Health, New Haven, CT, USA.

Corresponding author: Kristina Crothers ([crothk@uw.edu](mailto:crothk@uw.edu))

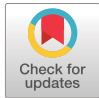

Shareable abstract (@ERSpublications)

Although commonly used, dexamethasone within 48 h of admission was associated with increased 90-day mortality in patients hospitalised with COVID-19 not on oxygen and with no mortality benefit in patients on low-flow nasal cannula <https://bit.ly/3l2aqjb>

**Cite this article as:** Crothers K, DeFaccio R, Tate J, *et al.* Dexamethasone in hospitalised COVID-19 patients not on intensive respiratory support. *Eur Respir J* 2022; 60: 2102532 [DOI: 10.1183/13993003.02532-2021].

This single-page version can be shared freely online.

## Abstract

**Background** Dexamethasone decreases mortality in coronavirus disease 2019 (COVID-19) patients on intensive respiratory support (IRS) but is of uncertain benefit if less severely ill. We determined whether early (within 48 h) dexamethasone was associated with mortality in patients hospitalised with COVID-19 not on IRS.

**Methods** We included patients admitted to US Veterans Affairs hospitals between 7 June 2020 and 31 May 2021 within 14 days after a positive test for severe acute respiratory syndrome coronavirus 2. Exclusions included recent prior corticosteroids and IRS within 48 h. We used inverse probability of treatment weighting (IPTW) to balance exposed and unexposed groups, and Cox proportional hazards models to determine 90-day all-cause mortality.

**Results** Of 19973 total patients (95% men, median age 71 years, 27% black), 15404 (77%) were without IRS within 48 h. Of these, 3514 out of 9450 (34%) patients on no oxygen received dexamethasone and 1042 (11%) died; 4472 out of 5954 (75%) patients on low-flow nasal cannula (NC) only received dexamethasone and 857 (14%) died. In IPTW stratified models, patients on no oxygen who received dexamethasone experienced 76% increased risk for 90-day mortality (hazard ratio (HR) 1.76, 95% CI 1.47–2.12); there was no association with mortality among patients on NC only (HR 1.08, 95% CI 0.86–1.36).

**Conclusions** In patients hospitalised with COVID-19, early initiation of dexamethasone was common and was associated with no mortality benefit among those on no oxygen or NC only in the first 48 h; instead, we found evidence of potential harm. These real-world findings do not support the use of early dexamethasone in hospitalised COVID-19 patients without IRS.

The content of this work is not subject to copyright. Design and branding are copyright ©ERS 2022.

This version is distributed under the terms of the Creative Commons Attribution Non-Commercial Licence 4.0. For commercial reproduction rights and permissions contact [permissions@ersnet.org](mailto:permissions@ersnet.org)

This article has an editorial commentary: <https://doi.org/10.1183/13993003.03222-2021>

Received: 21 Sept 2021  
Accepted: 17 Nov 2021

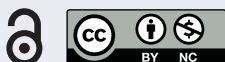

Supplement: ERJ-02532-2021.Shareable.pdf [file ERJ-02532-2021.Shareable.pdf]
