# Supplementary material for: Dexamethasone in hospitalised COVID-19 patients not on intensive respiratory support
Source: PubMed Central journal article supplement — Eur Respir J. 2022 Jul 14;60(1):2102532. doi: 10.1183/13993003.02532-2021 (PMC8841623; doi:10.1183/13993003.02532-2021), 2022-07-14
Supplement: ERJ-02532-2021.Supplement.pdf [file ERJ-02532-2021.Supplement.pdf]

## **Online Supplement**

### **Methods**

#### Study Population and Exclusions:

We conducted an observational cohort study using VA electronic health record (EHR) data. We identified patients admitted to a VA hospital within 14 days after a positive polymerase chain reaction (PCR) or antigen test for SARS-CoV-2 between June 7, 2020 and May 31, 2021. The cohort inception date of June 7, 2020 was selected because prior to this there was substantial variability in the timing of initiation of corticosteroids (greater use of late corticosteroids, more than 48 hours after admission) and in the type of corticosteroid used in hospitalized COVID-19 patients. After June 7, 2020, there was a substantial increase in initiation of corticosteroids – particularly dexamethasone – within 48 hours of hospitalization. Notably, this time period coincides with the announcement that recruitment was halted in the RECOVERY trial on June 8, 2020, and the subsequent press release that indicated benefit from dexamethasone on June 16, 2020. In addition, we omitted early months of the pandemic from March-May 2020 because there was significant variability in other aspects of care, including availability of testing and use of respiratory support and co-medications. The date of May 31, 2021 was selected as the end date for the cohort in order to have at least 90 days of follow-up for all individuals at the time of the analyses.

From the initial 27,168 patients identified, we excluded 7,195, yielding a cohort of 19,973 patients who were then stratified by category of respiratory support (Figure 1). More than one

exclusion criteria could apply; the most common reason was length of stay less than 48-hours (n=3,742; 104 deaths) as these patients had insufficient time to receive dexamethasone. This was followed by any systemic corticosteroid exposure prior to index date (n=2,046), defined as any corticosteroids within 14 days, or receipt of corticosteroids for  $\geq 14$  days in the preceding 45 days. We excluded patients who were transferred from another acute care hospital (VA or non-VA) and who were likely incidentally-detected through screening prior to or at admission; this included patients who were not admitted to an acute medical care service or had no International Classification of Diseases, 10<sup>th</sup> Revision (ICD-10) codes for COVID-19.

In modeling mortality analyses restricted to patients who were not on oxygen or were on low-flow nasal cannula (NC) only, we excluded an additional 454 total patients; more than one exclusion criteria could also apply. Within each phase, we restricted to facilities with at least 10 cases of COVID-19 and with at least one dexamethasone prescription (n=221), and where not 100% of patients with COVID-19 received dexamethasone (n=56) to have sufficient variation and number of events at each site. We also excluded patients prescribed hydroxychloroquine (n=89) as it was falling out of favor over the study time period; the temporal variation combined with the small number of participants made balancing them by site and across groups challenging. We excluded participants who were on vasopressors in the first 48 hours (n=90) as these patients may have had a different clinical indication (namely persistent shock) for dexamethasone or other corticosteroids and thus less likely to fall into a group for whom there is clinical equipoise, yielding a final analytic sample of 14,950 patients.

Respiratory Support: We stratified patients by highest level of respiratory support during the initial 48 hours of hospitalization. Schemas were developed iteratively with clinician review, including appropriate negation terms, based on snippets and note context. Patients on positive airway pressure (PAP) for sleep apnea without supplemental oxygen were classified as no oxygen. The NLP system was validated on 100 complete patient admissions by performing manual full chart review including of all clinician, nursing and respiratory therapy notes, comprising 1,093 days reviewed. Fifty admissions were double annotated and adjudicated demonstrating Cohen's kappa of 0.89. At the admission-level, receipt of any supplemental oxygen in categories 2-4 (NC, other/NIV and HFNC) was identified by the NLP system with a sensitivity of 100%. On chart review, no cases were found to have received oxygen that were not also identified by NLP as being on oxygen. Specificity and positive predictive value were 77% and 94% respectively. When limited to the first 48 hours of admission, the system distinguished patients not on oxygen or on NC only from all other categories with 92% accuracy.

Dexamethasone Exposure: In each phase, we defined administration by site as low (<25<sup>th</sup> percentile), medium (between 25-75% percentile), or high (>75<sup>th</sup> percentile) based on the proportion in the sample receiving corticosteroids.

**Supplemental Table E1. Unweighted and propensity weighted pseudo populations**  
**A. Unweighted population**

| Dexamethasone                              | No Oxygen      |                |            | Nasal Canula   |                |            | Combined Cohort |                |            |
|--------------------------------------------|----------------|----------------|------------|----------------|----------------|------------|-----------------|----------------|------------|
|                                            | No             | Yes            | SMD        | No             | Yes            | SMD        | No              | Yes            | SMD        |
| <b>Cohort, n</b>                           | 5726           | 3124           |            | 1290           | 4383           |            | 7016            | 7507           |            |
| <b>Age, (%)</b>                            |                |                |            |                |                |            |                 |                |            |
| <50                                        | 657<br>(11.5)  | 310 (9.9)      | -<br>0.016 | 80 (6.2)       | 356 (8.1)      | 0.019      | 737<br>(10.5)   | 666 (8.9)      | -<br>0.016 |
| 50-59                                      | 681<br>(11.9)  | 438<br>(14.0)  | 0.021      | 143<br>(11.1)  | 521<br>(11.9)  | 0.008      | 824<br>(11.7)   | 959<br>(12.8)  | 0.010      |
| 60-69                                      | 1339<br>(23.4) | 718<br>(23.0)  | -<br>0.004 | 282<br>(21.9)  | 995<br>(22.7)  | 0.008      | 1621<br>(23.1)  | 1713<br>(22.8) | -<br>0.003 |
| 70-79                                      | 1843<br>(32.2) | 1072<br>(34.3) | 0.021      | 462<br>(35.8)  | 1664<br>(38.0) | 0.022      | 2305<br>(32.9)  | 2736<br>(36.4) | 0.036      |
| 80+                                        | 1206<br>(21.1) | 586<br>(18.8)  | -<br>0.023 | 323<br>(25.0)  | 847<br>(19.3)  | -<br>0.057 | 1529<br>(21.8)  | 1433<br>(19.1) | -<br>0.027 |
| <b>Sex: Male, (%)</b>                      | 5428<br>(94.8) | 2963<br>(94.8) | 0.001      | 1227<br>(95.1) | 4168<br>(95.1) | 0.000      | 6655<br>(94.9)  | 7131<br>(95.0) | 0.001      |
| <b>Race, (%)</b>                           |                |                |            |                |                |            |                 |                |            |
| White, non-Hispanic                        | 2996<br>(52.3) | 1711<br>(54.8) | 0.024      | 724<br>(56.1)  | 2507<br>(57.2) | 0.011      | 3720<br>(53.0)  | 4218<br>(56.2) | 0.032      |
| Black, non-Hispanic                        | 1816<br>(31.7) | 820<br>(26.2)  | -<br>0.055 | 361<br>(28.0)  | 1077<br>(24.6) | -<br>0.034 | 2177<br>(31.0)  | 1897<br>(25.3) | -<br>0.058 |
| Hispanic                                   | 437 (7.6)      | 300 (9.6)      | 0.020      | 90 (7.0)       | 414 (9.4)      | 0.025      | 527 (7.5)       | 714 (9.5)      | 0.020      |
| Other                                      | 308 (5.4)      | 176 (5.6)      | 0.003      | 74 (5.7)       | 244 (5.6)      | 0.002      | 382 (5.4)       | 420 (5.6)      | 0.002      |
| Unknown                                    | 169 (3.0)      | 117 (3.7)      | 0.008      | 41 (3.2)       | 141 (3.2)      | 0.000      | 210 (3.0)       | 258 (3.4)      | 0.004      |
| <b>Phase (Admission Date), (%)</b>         |                |                |            |                |                |            |                 |                |            |
| 1: June 7 - July 11                        | 426 (7.4)      | 38 (1.2)       | -<br>0.062 | 289<br>(22.4)  | 258 (5.9)      | -<br>0.165 | 715<br>(10.2)   | 296 (3.9)      | -<br>0.062 |
| 2: July 12 - Aug. 15                       | 457 (8.0)      | 64 (2.0)       | -<br>0.059 | 201<br>(15.6)  | 468<br>(10.7)  | -<br>0.049 | 658 (9.4)       | 532 (7.1)      | -<br>0.023 |
| 3: Aug. 16 - Oct. 17                       | 694<br>(12.1)  | 186 (6.0)      | -<br>0.062 | 277<br>(21.5)  | 812<br>(18.5)  | -<br>0.029 | 971<br>(13.8)   | 998<br>(13.3)  | -<br>0.005 |
| 4: Oct. 18 - Nov. 30                       | 676<br>(11.8)  | 180 (5.8)      | -<br>0.060 | 183<br>(14.2)  | 993<br>(22.7)  | -<br>0.085 | 859<br>(12.2)   | 1173<br>(15.6) | -<br>0.034 |
| 5: Dec. 1 - Dec. 31                        | 1158<br>(20.2) | 947<br>(30.3)  | 0.101      | 137<br>(10.6)  | 696<br>(15.9)  | 0.053      | 1295<br>(18.5)  | 1643<br>(21.9) | 0.034      |
| 6: Jan. 1 - Jan. 31                        | 1063<br>(18.6) | 878<br>(28.1)  | 0.095      | 99 (7.7)       | 608<br>(13.9)  | 0.062      | 1162<br>(16.6)  | 1486<br>(19.8) | 0.032      |
| 7: Feb. 1 - May 31                         | 1252<br>(21.9) | 831<br>(26.6)  | 0.047      | 104 (8.1)      | 548<br>(12.5)  | 0.044      | 1356<br>(19.3)  | 1379<br>(18.4) | -<br>0.010 |
| <b>Site Dexamethasone Prescribing, (%)</b> |                |                |            |                |                |            |                 |                |            |
| Low                                        | 1689<br>(29.5) | 405<br>(13.0)  | -<br>0.165 | 399<br>(30.9)  | 594<br>(13.6)  | -<br>0.174 | 2088<br>(29.8)  | 999<br>(13.3)  | -<br>0.165 |
| Medium                                     | 3406<br>(59.5) | 1787<br>(57.2) | -<br>0.023 | 729<br>(56.5)  | 2451<br>(55.9) | -<br>0.006 | 4135<br>(58.9)  | 4238<br>(56.5) | -<br>0.025 |
| High                                       | 631<br>(11.0)  | 932<br>(29.8)  | 0.188      | 162<br>(12.6)  | 1338<br>(30.5) | 0.180      | 793<br>(11.3)   | 2270<br>(30.2) | 0.189      |
| <b>Smoking Status, (%)</b>                 |                |                |            |                |                |            |                 |                |            |
| Unknown                                    | 210 (3.7)      | 91 (2.9)       | -<br>0.008 | 49 (3.8)       | 117 (2.7)      | -<br>0.011 | 259 (3.7)       | 208 (2.8)      | -<br>0.009 |
| Never Smoker                               | 1958<br>(34.2) | 1173<br>(37.5) | 0.034      | 430<br>(33.3)  | 1479<br>(33.7) | 0.004      | 2388<br>(34.0)  | 2652<br>(35.3) | 0.013      |
| Former Smoker                              | 1934<br>(33.8) | 1268<br>(40.6) | 0.068      | 524<br>(40.6)  | 1936<br>(44.2) | 0.036      | 2458<br>(35.0)  | 3204<br>(42.7) | 0.076      |

| Dexamethasone                             | No Oxygen      |                |            | Nasal Canula  |                |            | Combined Cohort |                |            |
|-------------------------------------------|----------------|----------------|------------|---------------|----------------|------------|-----------------|----------------|------------|
|                                           | No             | Yes            | SMD        | No            | Yes            | SMD        | No              | Yes            | SMD        |
| Current Smoker                            | 1624<br>(28.4) | 592<br>(19.0)  | -<br>0.094 | 287<br>(22.2) | 851<br>(19.4)  | -<br>0.028 | 1911<br>(27.2)  | 1443<br>(19.2) | -<br>0.080 |
| <b>AUDIT-C Score (%)</b>                  |                |                |            |               |                |            |                 |                |            |
| Unknown                                   | 250 ( 4.4)     | 86 ( 2.8)      | -<br>0.016 | 62 ( 4.8)     | 125 ( 2.9)     | -<br>0.020 | 312 ( 4.4)      | 211 ( 2.8)     | -<br>0.016 |
| 0                                         | 3663<br>(64.0) | 2048<br>(65.6) | -<br>0.016 | 898<br>(69.6) | 2928<br>(66.8) | -<br>0.028 | 4561<br>(65.0)  | 4976<br>(66.3) | -<br>0.013 |
| 1-3                                       | 1164<br>(20.3) | 756<br>(24.2)  | -<br>0.039 | 255<br>(19.8) | 1055<br>(24.1) | -<br>0.043 | 1419<br>(20.2)  | 1811<br>(24.1) | -<br>0.039 |
| 4-7                                       | 389 ( 6.8)     | 182 ( 5.8)     | -<br>0.010 | 53 ( 4.1)     | 204 ( 4.7)     | -<br>0.005 | 442 ( 6.3)      | 386 ( 5.1)     | -<br>0.012 |
| 8+                                        | 260 ( 4.5)     | 52 ( 1.7)      | -<br>0.029 | 22 ( 1.7)     | 71 ( 1.6)      | -<br>0.001 | 282 ( 4.0)      | 123 ( 1.6)     | -<br>0.024 |
| <b>Comorbidities</b>                      |                |                |            |               |                |            |                 |                |            |
| Myocardial Infarction (%)                 | 534 ( 9.3)     | 228 ( 7.3)     | -<br>0.020 | 128 ( 9.9)    | 354 ( 8.1)     | -<br>0.018 | 662 ( 9.4)      | 582 ( 7.8)     | -<br>0.017 |
| Congestive Heart Failure (%)              | 1226<br>(21.4) | 618<br>(19.8)  | -<br>0.016 | 374<br>(29.0) | 898<br>(20.5)  | -<br>0.085 | 1600<br>(22.8)  | 1516<br>(20.2) | -<br>0.026 |
| Cerebrovascular Disease (%)               | 1110<br>(19.4) | 425<br>(13.6)  | -<br>0.058 | 248<br>(19.2) | 657<br>(15.0)  | -<br>0.042 | 1358<br>(19.4)  | 1082<br>(14.4) | -<br>0.049 |
| Dementia (%)                              | 946<br>(16.5)  | 269 ( 8.6)     | -<br>0.079 | 222<br>(17.2) | 405 ( 9.2)     | -<br>0.080 | 1168<br>(16.6)  | 674 ( 9.0)     | -<br>0.077 |
| Chronic Obstructive Pulmonary Disease (%) | 1312<br>(22.9) | 888<br>(28.4)  | -<br>0.055 | 417<br>(32.3) | 1416<br>(32.3) | -<br>0.000 | 1729<br>(24.6)  | 2304<br>(30.7) | -<br>0.060 |
| Rheumatoid Arthritis (%)                  | 78 ( 1.4)      | 54 ( 1.7)      | -<br>0.004 | 19 ( 1.5)     | 71 ( 1.6)      | -<br>0.001 | 97 ( 1.4)       | 125 ( 1.7)     | -<br>0.003 |
| Peptic ulcer (%)                          | 159 ( 2.8)     | 44 ( 1.4)      | -<br>0.014 | 35 ( 2.7)     | 85 ( 1.9)      | -<br>0.008 | 194 ( 2.8)      | 129 ( 1.7)     | -<br>0.010 |
| Liver disease, mild (%)                   | 834<br>(14.6)  | 327<br>(10.5)  | -<br>0.041 | 147<br>(11.4) | 435 ( 9.9)     | -<br>0.015 | 981<br>(14.0)   | 762<br>(10.2)  | -<br>0.038 |
| Diabetes, Uncomplicated (%)               | 2581<br>(45.1) | 1492<br>(47.8) | -<br>0.027 | 631<br>(48.9) | 2149<br>(49.0) | -<br>0.001 | 3212<br>(45.8)  | 3641<br>(48.5) | -<br>0.027 |
| Diabetes, Complicated (%)                 | 1771<br>(30.9) | 922<br>(29.5)  | -<br>0.014 | 427<br>(33.1) | 1314<br>(30.0) | -<br>0.031 | 2198<br>(31.3)  | 2236<br>(29.8) | -<br>0.015 |
| Hemi or paraplegia (%)                    | 203 ( 3.5)     | 48 ( 1.5)      | -<br>0.020 | 51 ( 4.0)     | 78 ( 1.8)      | -<br>0.022 | 254 ( 3.6)      | 126 ( 1.7)     | -<br>0.019 |
| Renal disease (%)                         | 1541<br>(26.9) | 733<br>(23.5)  | -<br>0.034 | 380<br>(29.5) | 1074<br>(24.5) | -<br>0.050 | 1921<br>(27.4)  | 1807<br>(24.1) | -<br>0.033 |
| Liver disease, moderate-severe (%)        | 124 ( 2.2)     | 48 ( 1.5)      | -<br>0.006 | 24 ( 1.9)     | 46 ( 1.0)      | -<br>0.008 | 148 ( 2.1)      | 94 ( 1.3)      | -<br>0.009 |
| Metastatic cancer (%)                     | 138 ( 2.4)     | 48 ( 1.5)      | -<br>0.009 | 24 ( 1.9)     | 80 ( 1.8)      | -<br>0.000 | 162 ( 2.3)      | 128 ( 1.7)     | -<br>0.006 |
| HIV (%)                                   | 69 ( 1.2)      | 37 ( 1.2)      | -<br>0.000 | 17 ( 1.3)     | 39 ( 0.9)      | -<br>0.004 | 86 ( 1.2)       | 76 ( 1.0)      | -<br>0.002 |
| <b>Charlson Comorbidities Count (%)</b>   |                |                |            |               |                |            |                 |                |            |
| 0                                         | 1128<br>(19.7) | 655<br>(21.0)  | -<br>0.013 | 209<br>(16.2) | 793<br>(18.1)  | -<br>0.019 | 1337<br>(19.1)  | 1448<br>(19.3) | -<br>0.002 |
| 1-2                                       | 1698<br>(29.7) | 1047<br>(33.5) | -<br>0.039 | 362<br>(28.1) | 1441<br>(32.9) | -<br>0.048 | 2060<br>(29.4)  | 2488<br>(33.1) | -<br>0.038 |
| 3-4                                       | 1268<br>(22.1) | 704<br>(22.5)  | -<br>0.004 | 310<br>(24.0) | 1097<br>(25.0) | -<br>0.010 | 1578<br>(22.5)  | 1801<br>(24.0) | -<br>0.015 |
| 5+                                        | 1632<br>(28.5) | 718<br>(23.0)  | -<br>0.055 | 409<br>(31.7) | 1052<br>(24.0) | -<br>0.077 | 2041<br>(29.1)  | 1770<br>(23.6) | -<br>0.055 |
| <b>Number of Doctors (prior year) (%)</b> |                |                |            |               |                |            |                 |                |            |
| 0                                         | 2421<br>(42.3) | 1291<br>(41.3) | -<br>0.010 | 493<br>(38.2) | 1639<br>(37.4) | -<br>0.008 | 2914<br>(41.5)  | 2930<br>(39.0) | -<br>0.025 |
| 1                                         | 1493<br>(26.1) | 872<br>(27.9)  | -<br>0.018 | 337<br>(26.1) | 1268<br>(28.9) | -<br>0.028 | 1830<br>(26.1)  | 2140<br>(28.5) | -<br>0.024 |
| 2-4                                       | 1665<br>(29.1) | 901<br>(28.8)  | -<br>0.002 | 413<br>(32.0) | 1368<br>(31.2) | -<br>0.008 | 2078<br>(29.6)  | 2269<br>(30.2) | -<br>0.006 |
| 5+                                        | 147 ( 2.6)     | 60 ( 1.9)      | -<br>0.006 | 47 ( 3.6)     | 108 ( 2.5)     | -<br>0.012 | 194 ( 2.8)      | 168 ( 2.2)     | -<br>0.005 |

| Dexamethasone                                            | No Oxygen      |                |            | Nasal Canula  |                |            | Combined Cohort |                |            |
|----------------------------------------------------------|----------------|----------------|------------|---------------|----------------|------------|-----------------|----------------|------------|
|                                                          | No             | Yes            | SMD        | No            | Yes            | SMD        | No              | Yes            | SMD        |
| <b>Specialty clinics attended</b>                        |                |                |            |               |                |            |                 |                |            |
| Cardiology (%)                                           | 1394<br>(24.3) | 809<br>(25.9)  | 0.016      | 405<br>(31.4) | 1262<br>(28.8) | -<br>0.026 | 1799<br>(25.6)  | 2071<br>(27.6) | 0.019      |
| Coagulation (%)                                          | 93 (1.6)       | 59 (1.9)       | 0.003      | 24 (1.9)      | 58 (1.3)       | -<br>0.005 | 117 (1.7)       | 117 (1.6)      | -<br>0.001 |
| Pacemaker (%)                                            | 198 (3.5)      | 81 (2.6)       | -<br>0.009 | 67 (5.2)      | 127 (2.9)      | -<br>0.023 | 265 (3.8)       | 208 (2.8)      | -<br>0.010 |
| Dialysis (%)                                             | 93 (1.6)       | 29 (0.9)       | -<br>0.007 | 38 (2.9)      | 53 (1.2)       | -<br>0.017 | 131 (1.9)       | 82 (1.1)       | -<br>0.008 |
| Gastroenterology (%)                                     | 493 (8.6)      | 292 (9.3)      | 0.007      | 107 (8.3)     | 434 (9.9)      | 0.016      | 600 (8.6)       | 726 (9.7)      | 0.011      |
| Hepatology (%)                                           | 224 (3.9)      | 72 (2.3)       | -<br>0.016 | 41 (3.2)      | 109 (2.5)      | -<br>0.007 | 265 (3.8)       | 181 (2.4)      | -<br>0.014 |
| Homeless (%)                                             | 517 (9.0)      | 124 (4.0)      | -<br>0.051 | 78 (6.0)      | 139 (3.2)      | -<br>0.029 | 595 (8.5)       | 263 (3.5)      | -<br>0.050 |
| <b>Co-Medications</b>                                    |                |                |            |               |                |            |                 |                |            |
| Prophylactic Anticoagulants 1 <sup>st</sup> 48 hours (%) | 4006<br>(70.0) | 2375<br>(76.0) | 0.061      | 883<br>(68.4) | 3404<br>(77.7) | 0.092      | 4889<br>(69.7)  | 5779<br>(77.0) | 0.073      |
| Remdesivir, 1 <sup>st</sup> 48 hours (%)                 | 445 (7.8)      | 2115<br>(67.7) | 0.599      | 268<br>(20.8) | 3302<br>(75.3) | 0.546      | 713<br>(10.2)   | 5417<br>(72.2) | 0.620      |
| <b>Laboratory values</b>                                 |                |                |            |               |                |            |                 |                |            |
| Albumin, g/dL (%)                                        |                |                |            |               |                |            |                 |                |            |
| 3.5 +                                                    | 2300<br>(40.2) | 916<br>(29.3)  | -<br>0.108 | 384<br>(29.8) | 1122<br>(25.6) | -<br>0.042 | 2684<br>(38.3)  | 2038<br>(27.1) | -<br>0.111 |
| 3 - 3.49                                                 | 1720<br>(30.0) | 1116<br>(35.7) | 0.057      | 434<br>(33.6) | 1581<br>(36.1) | 0.024      | 2154<br>(30.7)  | 2697<br>(35.9) | 0.052      |
| < 3                                                      | 1315<br>(23.0) | 971<br>(31.1)  | 0.081      | 399<br>(30.9) | 1550<br>(35.4) | 0.044      | 1714<br>(24.4)  | 2521<br>(33.6) | 0.092      |
| Missing                                                  | 391 (6.8)      | 121 (3.9)      | -<br>0.030 | 73 (5.7)      | 130 (3.0)      | -<br>0.027 | 464 (6.6)       | 251 (3.3)      | -<br>0.033 |
| Alanine aminotransferase, IU/L (%)                       |                |                |            |               |                |            |                 |                |            |
| < 20                                                     | 1864<br>(32.6) | 633<br>(20.3)  | -<br>0.123 | 409<br>(31.7) | 931<br>(21.2)  | -<br>0.105 | 2273<br>(32.4)  | 1564<br>(20.8) | -<br>0.116 |
| 20 - 39                                                  | 2170<br>(37.9) | 1348<br>(43.1) | 0.053      | 511<br>(39.6) | 1873<br>(42.7) | 0.031      | 2681<br>(38.2)  | 3221<br>(42.9) | 0.047      |
| 40 +                                                     | 1290<br>(22.5) | 1105<br>(35.4) | 0.128      | 300<br>(23.3) | 1526<br>(34.8) | 0.116      | 1590<br>(22.7)  | 2631<br>(35.0) | 0.124      |
| Missing                                                  | 402 (7.0)      | 38 (1.2)       | -<br>0.058 | 70 (5.4)      | 53 (1.2)       | -<br>0.042 | 472 (6.7)       | 91 (1.2)       | -<br>0.055 |
| Asparate aminostransferase, IU/L (%)                     |                |                |            |               |                |            |                 |                |            |
| < 20                                                     | 1565<br>(27.3) | 287 (9.2)      | -<br>0.181 | 276<br>(21.4) | 331 (7.6)      | -<br>0.138 | 1841<br>(26.2)  | 618 (8.2)      | -<br>0.180 |
| 20 - 39                                                  | 2501<br>(43.7) | 1344<br>(43.0) | -<br>0.007 | 574<br>(44.5) | 1848<br>(42.2) | -<br>0.023 | 3075<br>(43.8)  | 3192<br>(42.5) | -<br>0.013 |
| 40 +                                                     | 1660<br>(29.0) | 1493<br>(47.8) | 0.188      | 440<br>(34.1) | 2204<br>(50.3) | 0.162      | 2100<br>(29.9)  | 3697<br>(49.2) | 0.193      |
| Creatinine, mg/dL (%)                                    |                |                |            |               |                |            |                 |                |            |
| < 1.2                                                    | 2726<br>(47.6) | 1427<br>(45.7) | -<br>0.019 | 540<br>(41.9) | 2015<br>(46.0) | -<br>0.041 | 3266<br>(46.6)  | 3442<br>(45.9) | -<br>0.007 |
| 1.2 – 1.99                                               | 1899<br>(33.2) | 1235<br>(39.5) | 0.064      | 479<br>(37.1) | 1655<br>(37.8) | 0.006      | 2378<br>(33.9)  | 2890<br>(38.5) | 0.046      |
| 2 +                                                      | 1013<br>(17.7) | 443<br>(14.2)  | -<br>0.035 | 258<br>(20.0) | 706<br>(16.1)  | -<br>0.039 | 1271<br>(18.1)  | 1149<br>(15.3) | -<br>0.028 |
| Missing                                                  | 88 (1.5)       | 19 (0.6)       | -<br>0.009 | 13 (1.0)      | 7 (0.2)        | -<br>0.008 | 101 (1.4)       | 26 (0.3)       | -<br>0.011 |
| Fibrosis-4 Index (%)                                     |                |                |            |               |                |            |                 |                |            |

| Dexamethasone                           | No Oxygen      |                |            | Nasal Canula  |                |            | Combined Cohort |                |            |
|-----------------------------------------|----------------|----------------|------------|---------------|----------------|------------|-----------------|----------------|------------|
|                                         | No             | Yes            | SMD        | No            | Yes            | SMD        | No              | Yes            | SMD        |
| < 1.45                                  | 1391<br>(24.3) | 539<br>(17.3)  | -<br>0.070 | 210<br>(16.3) | 599<br>(13.7)  | -<br>0.026 | 1601<br>(22.8)  | 1138<br>(15.2) | -<br>0.077 |
| 1.45 – 3.25                             | 2232<br>(39.0) | 1313<br>(42.0) | 0.030      | 512<br>(39.7) | 1923<br>(43.9) | 0.042      | 2744<br>(39.1)  | 3236<br>(43.1) | 0.040      |
| 3.25 +                                  | 1661<br>(29.0) | 1226<br>(39.2) | 0.102      | 496<br>(38.4) | 1800<br>(41.1) | 0.026      | 2157<br>(30.7)  | 3026<br>(40.3) | 0.096      |
| Missing                                 | 442 ( 7.7)     | 46 ( 1.5)      | -<br>0.062 | 72 ( 5.6)     | 61 ( 1.4)      | -<br>0.042 | 514 ( 7.3)      | 107 ( 1.4)     | -<br>0.059 |
| <b>Lactate, mmol/L (%)</b>              |                |                |            |               |                |            |                 |                |            |
| <1.2                                    | 739<br>(12.9)  | 482<br>(15.4)  | 0.025      | 215<br>(16.7) | 707<br>(16.1)  | -<br>0.005 | 954<br>(13.6)   | 1189<br>(15.8) | 0.022      |
| 1.2 - <2.0                              | 1164<br>(20.3) | 929<br>(29.7)  | 0.094      | 331<br>(25.7) | 1423<br>(32.5) | 0.068      | 1495<br>(21.3)  | 2352<br>(31.3) | 0.100      |
| 2.0+                                    | 667<br>(11.6)  | 564<br>(18.1)  | 0.064      | 193<br>(15.0) | 727<br>(16.6)  | 0.016      | 860<br>(12.3)   | 1291<br>(17.2) | 0.049      |
| Missing                                 | 3156<br>(55.1) | 1149<br>(36.8) | -<br>0.183 | 551<br>(42.7) | 1526<br>(34.8) | -<br>0.079 | 3707<br>(52.8)  | 2675<br>(35.6) | -<br>0.172 |
| <b>Platelet count per microL (%)</b>    |                |                |            |               |                |            |                 |                |            |
| 150 or higher                           | 3900<br>(68.1) | 2099<br>(67.2) | -<br>0.009 | 803<br>(62.2) | 2962<br>(67.6) | -<br>0.053 | 4703<br>(67.0)  | 5061<br>(67.4) | -<br>0.004 |
| < 150                                   | 1741<br>(30.4) | 1019<br>(32.6) | 0.022      | 479<br>(37.1) | 1416<br>(32.3) | -<br>0.048 | 2220<br>(31.6)  | 2435<br>(32.4) | 0.008      |
| Missing                                 | 85 ( 1.5)      | 6 ( 0.2)       | -<br>0.013 | 8 ( 0.6)      | 5 ( 0.1)       | -<br>0.005 | 93 ( 1.3)       | 11 ( 0.1)      | -<br>0.012 |
| <b>Total bilirubin, mg/dL (%)</b>       |                |                |            |               |                |            |                 |                |            |
| <1                                      | 4102<br>(71.6) | 2299<br>(73.6) | 0.020      | 954<br>(74.0) | 3219<br>(73.4) | -<br>0.005 | 5056<br>(72.1)  | 5518<br>(73.5) | 0.014      |
| 1 - 1.2                                 | 449 ( 7.8)     | 295 ( 9.4)     | 0.016      | 113 ( 8.8)    | 467<br>(10.7)  | 0.019      | 562 ( 8.0)      | 762<br>(10.2)  | 0.021      |
| 1.2 +                                   | 797<br>(13.9)  | 473<br>(15.1)  | 0.012      | 156<br>(12.1) | 640<br>(14.6)  | 0.025      | 953<br>(13.6)   | 1113<br>(14.8) | 0.012      |
| Missing                                 | 378 ( 6.6)     | 57 ( 1.8)      | -<br>0.048 | 67 ( 5.2)     | 57 ( 1.3)      | -<br>0.039 | 445 ( 6.3)      | 114 ( 1.5)     | -<br>0.048 |
| <b>White Blood Count per microL (%)</b> |                |                |            |               |                |            |                 |                |            |
| 4-10                                    | 3426<br>(59.8) | 1443<br>(46.2) | -<br>0.136 | 732<br>(56.7) | 1890<br>(43.1) | -<br>0.136 | 4158<br>(59.3)  | 3333<br>(44.4) | -<br>0.149 |
| <4                                      | 1320<br>(23.1) | 915<br>(29.3)  | 0.062      | 346<br>(26.8) | 1344<br>(30.7) | 0.038      | 1666<br>(23.7)  | 2259<br>(30.1) | 0.063      |
| >10                                     | 980<br>(17.1)  | 766<br>(24.5)  | 0.074      | 212<br>(16.4) | 1149<br>(26.2) | 0.098      | 1192<br>(17.0)  | 1915<br>(25.5) | 0.085      |
| C-reactive protein measured (%)         | 2786<br>(48.7) | 1947<br>(62.3) | 0.137      | 723<br>(56.0) | 2793<br>(63.7) | 0.077      | 3509<br>(50.0)  | 4740<br>(63.1) | 0.131      |
| D-dimer measured (%)                    | 3676<br>(64.2) | 2635<br>(84.3) | 0.201      | 986<br>(76.4) | 3682<br>(84.0) | 0.076      | 4662<br>(66.4)  | 6317<br>(84.1) | 0.177      |
| <b>Vital Signs</b>                      |                |                |            |               |                |            |                 |                |            |
| <b>Highest Temperature (F) (%)</b>      |                |                |            |               |                |            |                 |                |            |
| < 99                                    | 2620<br>(45.8) | 1071<br>(34.3) | -<br>0.115 | 396<br>(30.7) | 1409<br>(32.1) | -<br>0.014 | 3016<br>(43.0)  | 2480<br>(33.0) | -<br>0.100 |
| 99 - 100                                | 1441<br>(25.2) | 752<br>(24.1)  | -<br>0.011 | 312<br>(24.2) | 1026<br>(23.4) | -<br>0.008 | 1753<br>(25.0)  | 1778<br>(23.7) | -<br>0.013 |
| 100 - 102                               | 1176<br>(20.5) | 888<br>(28.4)  | 0.079      | 386<br>(29.9) | 1316<br>(30.0) | 0.001      | 1562<br>(22.3)  | 2204<br>(29.4) | 0.071      |
| 102 +                                   | 475 ( 8.3)     | 397<br>(12.7)  | 0.044      | 194<br>(15.0) | 614<br>(14.0)  | -<br>0.010 | 669 ( 9.5)      | 1011<br>(13.5) | -<br>0.039 |
| Missing                                 | 14 ( 0.2)      | 16 ( 0.5)      | -<br>0.003 | 2 ( 0.2)      | 18 ( 0.4)      | -<br>0.003 | 16 ( 0.2)       | 34 ( 0.5)      | -<br>0.002 |
| <b>Mean Arterial Pressure, mmHg (%)</b> |                |                |            |               |                |            |                 |                |            |
| < 60                                    | 155 ( 2.7)     | 55 ( 1.8)      | -<br>0.009 | 51 ( 4.0)     | 74 ( 1.7)      | -<br>0.023 | 206 ( 2.9)      | 129 ( 1.7)     | -<br>0.012 |

| Dexamethasone                | No Oxygen      |                |            | Nasal Canula  |                |            | Combined Cohort |                |            |
|------------------------------|----------------|----------------|------------|---------------|----------------|------------|-----------------|----------------|------------|
|                              | No             | Yes            | SMD        | No            | Yes            | SMD        | No              | Yes            | SMD        |
| 60 – 69                      | 787<br>(13.7)  | 342<br>(10.9)  | -<br>0.028 | 222<br>(17.2) | 550<br>(12.5)  | -<br>0.047 | 1009<br>(14.4)  | 892<br>(11.9)  | -<br>0.025 |
| 70 – 89                      | 3629<br>(63.4) | 2092<br>(67.0) | 0.036      | 828<br>(64.2) | 2998<br>(68.4) | 0.042      | 4457<br>(63.5)  | 5090<br>(67.8) | 0.043      |
| 90 +                         | 1144<br>(20.0) | 625<br>(20.0)  | 0.000      | 188<br>(14.6) | 747<br>(17.0)  | 0.025      | 1332<br>(19.0)  | 1372<br>(18.3) | -<br>0.007 |
| Missing                      | 11 ( 0.2)      | 10 ( 0.3)      | 0.001      | 1 ( 0.1)      | 14 ( 0.3)      | 0.002      | 12 ( 0.2)       | 24 ( 0.3)      | 0.001      |
| Lowest Oxygen Saturation (%) |                |                |            |               |                |            |                 |                |            |
| < 88                         | 118 ( 2.1)     | 319<br>(10.2)  | 0.082      | 106 ( 8.2)    | 622<br>(14.2)  | 0.060      | 224 ( 3.2)      | 941<br>(12.5)  | 0.093      |
| 88 - 92                      | 1603<br>(28.0) | 1660<br>(53.1) | 0.251      | 643<br>(49.8) | 2702<br>(61.6) | 0.118      | 2246<br>(32.0)  | 4362<br>(58.1) | 0.261      |
| 93 - 95                      | 2690<br>(47.0) | 863<br>(27.6)  | -<br>0.194 | 401<br>(31.1) | 794<br>(18.1)  | -<br>0.130 | 3091<br>(44.1)  | 1657<br>(22.1) | -<br>0.220 |
| 96 +                         | 1193<br>(20.8) | 216 ( 6.9)     | -<br>0.139 | 118 ( 9.1)    | 165 ( 3.8)     | -<br>0.054 | 1311<br>(18.7)  | 381 ( 5.1)     | -<br>0.136 |
| Missing                      | 122 ( 2.1)     | 66 ( 2.1)      | 0.000      | 22 ( 1.7)     | 100 ( 2.3)     | 0.006      | 144 ( 2.1)      | 166 ( 2.2)     | 0.002      |



## B. Propensity weighted pseudo population estimating the average treatment effect in the entire population (ATE)

| Dexamethasone                              | No Oxygen        |                  |            | Nasal Canula     |                  |            | Combined Cohort   |                   |            |
|--------------------------------------------|------------------|------------------|------------|------------------|------------------|------------|-------------------|-------------------|------------|
|                                            | No               | Yes              | SMD        | No               | Yes              | SMD        | No                | Yes               | SMD        |
| <b>Cohort, n</b>                           | 8072.1           | 6801.3           |            | 3594.6           | 5602.9           |            | 11963.6           | 12887.0           |            |
| <b>Age, (%)</b>                            |                  |                  |            |                  |                  |            |                   |                   |            |
| <50                                        | 807.0<br>(10.0)  | 648.8<br>(9.5)   | -<br>0.005 | 271.7<br>(7.6)   | 436.5<br>(7.8)   | -<br>0.002 | 1082.7<br>(9.0)   | 1142.0<br>(8.9)   | -<br>0.002 |
| 50-59                                      | 991.0<br>(12.3)  | 847.1<br>(12.5)  | 0.002      | 376.8<br>(10.5)  | 657.9<br>(11.7)  | 0.013      | 1367.3<br>(11.4)  | 1551.5<br>(12.0)  | 0.006      |
| 60-69                                      | 1863.5<br>(23.1) | 1658.1<br>(24.4) | 0.013      | 802.6<br>(22.3)  | 1254.6<br>(22.4) | 0.001      | 2800.3<br>(23.0)  | 2959.5<br>(23.0)  | -<br>0.004 |
| 70-79                                      | 2694.9<br>(33.4) | 2283.9<br>(33.6) | 0.002      | 1331.8<br>(37.0) | 2122.6<br>(37.9) | 0.008      | 4206.0<br>(35.2)  | 4662.9<br>(36.2)  | 0.010      |
| 80+                                        | 1715.8<br>(21.3) | 1363.5<br>(20.0) | -<br>0.012 | 811.8<br>(22.6)  | 1131.3<br>(20.2) | -<br>0.024 | 2507.4<br>(21.0)  | 2571.2<br>(20.0)  | -<br>0.010 |
| <b>Sex: Male, (%)</b>                      | 7651.9<br>(94.8) | 6471.7<br>(95.2) | 0.004      | 3392.6<br>(94.4) | 5332.5<br>(95.2) | 0.008      | 11323.9<br>(94.7) | 12237.6<br>(95.0) | 0.003      |
| <b>Race, (%)</b>                           |                  |                  |            |                  |                  |            |                   |                   |            |
| White, non-Hispanic                        | 4298.8<br>(53.3) | 3657.7<br>(53.8) | 0.005      | 2017.2<br>(56.1) | 3172.8<br>(56.6) | 0.005      | 6430.7<br>(53.8)  | 7170.0<br>(55.6)  | 0.019      |
| Black, non-Hispanic                        | 2443.2<br>(30.3) | 1883.4<br>(27.7) | 0.026      | 933.2<br>(26.0)  | 1416.2<br>(25.3) | 0.007      | 3567.0<br>(29.8)  | 3507.0<br>(27.2)  | -<br>0.026 |
| Hispanic                                   | 666.2<br>(8.3)   | 673.0<br>(9.9)   | 0.016      | 272.0<br>(7.6)   | 483.8<br>(8.6)   | 0.011      | 940.7<br>(7.9)    | 1120.5<br>(8.7)   | 0.008      |
| Other                                      | 428.3<br>(5.3)   | 348.7<br>(5.1)   | -<br>0.002 | 236.1<br>(6.6)   | 341.5<br>(6.1)   | -<br>0.005 | 666.5<br>(5.6)    | 673.5<br>(5.2)    | -<br>0.003 |
| Unknown                                    | 235.5<br>(2.9)   | 238.5<br>(3.5)   | 0.006      | 136.2<br>(3.8)   | 188.6<br>(3.4)   | -<br>0.004 | 358.7<br>(3.0)    | 416.1<br>(3.2)    | -<br>0.002 |
| <b>Phase (Admission Date) , (%)</b>        |                  |                  |            |                  |                  |            |                   |                   |            |
| 1: June 7 - July 11                        | 444.3<br>(5.5)   | 212.1<br>(3.1)   | -<br>0.024 | 607.5<br>(16.9)  | 576.6<br>(10.3)  | -<br>0.066 | 1112.0<br>(9.3)   | 865.6<br>(6.7)    | -<br>0.026 |
| 2: July 12 - Aug. 15                       | 501.3<br>(6.2)   | 225.4<br>(3.3)   | -<br>0.029 | 569.6<br>(15.8)  | 656.1<br>(11.7)  | -<br>0.041 | 1063.1<br>(8.9)   | 1074.1<br>(8.3)   | -<br>0.006 |
| 3: Aug. 16 - Oct. 17                       | 937.0<br>(11.6)  | 674.2<br>(9.9)   | -<br>0.017 | 824.3<br>(22.9)  | 1101.0<br>(19.7) | -<br>0.033 | 1764.3<br>(14.7)  | 1784.1<br>(13.8)  | -<br>0.009 |
| 4: Oct. 18 - Nov. 30                       | 895.1<br>(11.1)  | 628.7<br>(9.2)   | -<br>0.018 | 560.0<br>(15.6)  | 1163.1<br>(20.8) | -<br>0.052 | 1567.9<br>(13.1)  | 1894.9<br>(14.7)  | -<br>0.016 |
| 5: Dec. 1 - Dec. 31                        | 1841.7<br>(22.8) | 1806.4<br>(26.6) | 0.037      | 384.9<br>(10.7)  | 809.7<br>(14.5)  | 0.037      | 2347.1<br>(19.6)  | 2693.3<br>(20.9)  | 0.013      |
| 6: Jan. 1 - Jan. 31                        | 1620.7<br>(20.1) | 1653.3<br>(24.3) | 0.042      | 350.0<br>(9.7)   | 676.4<br>(12.1)  | 0.023      | 1998.7<br>(16.7)  | 2315.6<br>(18.0)  | 0.013      |
| 7: Feb. 1 - May 31                         | 1832.1<br>(22.7) | 1601.3<br>(23.5) | 0.008      | 298.4<br>(8.3)   | 620.1<br>(11.1)  | 0.028      | 2110.5<br>(17.6)  | 2259.4<br>(17.5)  | -<br>0.001 |
| <b>Site Dexamethasone Prescribing, (%)</b> |                  |                  |            |                  |                  |            |                   |                   |            |
| Low                                        | 2026.5<br>(25.1) | 1094.8<br>(16.1) | -<br>0.090 | 938.8<br>(26.1)  | 974.2<br>(17.4)  | -<br>0.087 | 3173.2<br>(26.5)  | 2421.9<br>(18.8)  | -<br>0.077 |
| Medium                                     | 4815.2<br>(59.7) | 4102.3<br>(60.3) | 0.007      | 2151.7<br>(59.9) | 3175.9<br>(56.7) | 0.032      | 7115.5<br>(59.5)  | 7480.7<br>(58.0)  | -<br>0.014 |
| High                                       | 1230.4<br>(15.2) | 1604.2<br>(23.6) | 0.083      | 504.1<br>(14.0)  | 1452.7<br>(25.9) | 0.119      | 1674.9<br>(14.0)  | 2984.5<br>(23.2)  | 0.092      |
| <b>Smoking Status, (%)</b>                 |                  |                  |            |                  |                  |            |                   |                   |            |
| Unknown                                    | 262.5<br>(3.3)   | 187.8<br>(2.8)   | -<br>0.005 | 109.3<br>(3.0)   | 158.1<br>(2.8)   | -<br>0.002 | 384.8<br>(3.2)    | 384.5<br>(3.0)    | -<br>0.002 |
| Never Smoker                               | 2848.7<br>(35.3) | 2590.4<br>(38.1) | 0.028      | 1201.3<br>(33.4) | 1886.7<br>(33.7) | 0.003      | 4080.9<br>(34.1)  | 4491.1<br>(34.8)  | 0.007      |
| Former Smoker                              | 2952.7<br>(36.6) | 2577.3<br>(37.9) | 0.013      | 1481.1<br>(41.2) | 2425.1<br>(43.3) | 0.021      | 4576.0<br>(38.2)  | 5277.6<br>(41.0)  | 0.027      |
| Current Smoker                             | 2008.2<br>(24.9) | 1445.8<br>(21.3) | -<br>0.036 | 802.9<br>(22.3)  | 1133.0<br>(20.2) | -<br>0.021 | 2921.8<br>(24.4)  | 2734.0<br>(21.2)  | -<br>0.032 |

| Dexamethasone                             | No Oxygen        |                  |            | Nasal Canula     |                  |            | Combined Cohort  |                  |            |
|-------------------------------------------|------------------|------------------|------------|------------------|------------------|------------|------------------|------------------|------------|
|                                           | No               | Yes              | SMD        | No               | Yes              | SMD        | No               | Yes              | SMD        |
| <b>AUDIT-C Score (%)</b>                  |                  |                  |            |                  |                  |            |                  |                  |            |
| Unknown                                   | 302.2<br>(3.7)   | 195.8<br>(2.9)   | -<br>0.009 | 122.4<br>(3.4)   | 166.8<br>(3.0)   | -<br>0.004 | 441.7<br>(3.7)   | 431.4<br>(3.3)   | -<br>0.003 |
| 0                                         | 5274.8<br>(65.3) | 4451.1<br>(65.4) | 0.001      | 2454.8<br>(68.3) | 3800.4<br>(67.8) | -<br>0.005 | 7978.6<br>(66.7) | 8489.5<br>(65.9) | -<br>0.008 |
| 1-3                                       | 1648.0<br>(20.4) | 1553.9<br>(22.8) | 0.024      | 795.5<br>(22.1)  | 1293.3<br>(23.1) | 0.010      | 2456.4<br>(20.5) | 2962.0<br>(23.0) | 0.025      |
| 4-7                                       | 562.1<br>(7.0)   | 435.6<br>(6.4)   | -<br>0.006 | 169.8<br>(4.7)   | 253.7<br>(4.5)   | -<br>0.002 | 734.5<br>(6.1)   | 719.6<br>(5.6)   | -<br>0.006 |
| 8+                                        | 285.1<br>(3.5)   | 164.9<br>(2.4)   | -<br>0.011 | 52.0<br>(1.4)    | 88.7<br>(1.6)    | -<br>0.001 | 352.5<br>(2.9)   | 284.6<br>(2.2)   | -<br>0.007 |
| <b>Comorbidities</b>                      |                  |                  |            |                  |                  |            |                  |                  |            |
| Myocardial Infarction (%)                 | 714.1<br>(8.8)   | 504.4<br>(7.4)   | -<br>0.014 | 373.0<br>(10.4)  | 495.4<br>(8.8)   | -<br>0.015 | 1078.8<br>(9.0)  | 1096.0<br>(8.5)  | -<br>0.005 |
| Congestive Heart Failure (%)              | 1718.5<br>(21.3) | 1375.3<br>(20.2) | -<br>0.011 | 921.3<br>(25.6)  | 1282.0<br>(22.9) | -<br>0.027 | 2678.1<br>(22.4) | 2865.7<br>(22.2) | -<br>0.001 |
| Cerebrovascular Disease (%)               | 1437.7<br>(17.8) | 1065.1<br>(15.7) | -<br>0.022 | 655.4<br>(18.2)  | 930.5<br>(16.6)  | -<br>0.016 | 2113.7<br>(17.7) | 2094.2<br>(16.3) | -<br>0.014 |
| Dementia (%)                              | 1177.4<br>(14.6) | 727.9<br>(10.7)  | -<br>0.039 | 530.7<br>(14.8)  | 635.2<br>(11.3)  | -<br>0.034 | 1748.8<br>(14.6) | 1448.8<br>(11.2) | -<br>0.034 |
| Chronic Obstructive Pulmonary Disease (%) | 1970.4<br>(24.4) | 1759.3<br>(25.9) | 0.015      | 1124.8<br>(31.3) | 1812.0<br>(32.3) | 0.010      | 3131.2<br>(26.2) | 3760.1<br>(29.2) | 0.030      |
| Rheumatoid Arthritis (%)                  | 124.1<br>(1.5)   | 94.5<br>(1.4)    | -<br>0.001 | 69.5<br>(1.9)    | 86.0<br>(1.5)    | -<br>0.004 | 186.2<br>(1.6)   | 206.8<br>(1.6)   | -<br>0.000 |
| Peptic ulcer (%)                          | 179.7<br>(2.2)   | 103.2<br>(1.5)   | -<br>0.007 | 88.0<br>(2.4)    | 127.5<br>(2.3)   | -<br>0.002 | 272.0<br>(2.3)   | 270.9<br>(2.1)   | -<br>0.002 |
| Liver disease, mild (%)                   | 1053.4<br>(13.0) | 848.3<br>(12.5)  | -<br>0.006 | 364.9<br>(10.1)  | 577.9<br>(10.3)  | -<br>0.002 | 1504.2<br>(12.6) | 1452.8<br>(11.3) | -<br>0.013 |
| Diabetes, Uncomplicated (%)               | 3704.1<br>(45.9) | 3265.6<br>(48.0) | 0.021      | 1757.1<br>(48.9) | 2760.5<br>(49.3) | 0.004      | 5683.8<br>(47.5) | 6182.6<br>(48.0) | 0.005      |
| Diabetes, Complicated (%)                 | 2520.2<br>(31.2) | 2086.1<br>(30.7) | -<br>0.005 | 1167.4<br>(32.5) | 1714.2<br>(30.6) | -<br>0.019 | 3873.3<br>(32.4) | 3969.4<br>(30.8) | -<br>0.016 |
| Hemi or paraplegia (%)                    | 235.8<br>(2.9)   | 140.1<br>(2.1)   | -<br>0.009 | 99.2<br>(2.8)    | 120.2<br>(2.1)   | -<br>0.006 | 341.0<br>(2.9)   | 285.3<br>(2.2)   | -<br>0.006 |
| Renal disease (%)                         | 2155.8<br>(26.7) | 1794.8<br>(26.4) | -<br>0.003 | 1062.6<br>(29.6) | 1449.3<br>(25.9) | -<br>0.037 | 3228.2<br>(27.0) | 3422.0<br>(26.6) | -<br>0.004 |
| Liver disease, moderate-severe (%)        | 170.9<br>(2.1)   | 125.7<br>(1.8)   | -<br>0.003 | 42.0<br>(1.2)    | 68.6<br>(1.2)    | -<br>0.001 | 226.5<br>(1.9)   | 205.6<br>(1.6)   | -<br>0.003 |
| Metastatic cancer (%)                     | 189.7<br>(2.4)   | 135.6<br>(2.0)   | -<br>0.004 | 66.2<br>(1.8)    | 108.0<br>(1.9)   | -<br>0.001 | 293.0<br>(2.4)   | 256.2<br>(2.0)   | -<br>0.005 |
| HIV (%)                                   | 99.5<br>(1.2)    | 94.0<br>(1.4)    | -<br>0.002 | 66.2<br>(1.8)    | 71.8<br>(1.3)    | -<br>0.006 | 153.5<br>(1.3)   | 150.8<br>(1.2)   | -<br>0.001 |
| <b>Charlson Comorbidities Count (%)</b>   |                  |                  |            |                  |                  |            |                  |                  |            |
| 0                                         | 1564.1<br>(19.4) | 1339.5<br>(19.7) | 0.003      | 617.6<br>(17.2)  | 973.5<br>(17.4)  | 0.002      | 2212.6<br>(18.5) | 2412.7<br>(18.7) | 0.002      |
| 1-2                                       | 2451.6<br>(30.4) | 2182.3<br>(32.1) | 0.017      | 1031.5<br>(28.7) | 1768.4<br>(31.6) | 0.029      | 3634.1<br>(30.4) | 4065.3<br>(31.5) | 0.012      |
| 3-4                                       | 1831.3<br>(22.7) | 1492.8<br>(21.9) | -<br>0.007 | 883.1<br>(24.6)  | 1378.4<br>(24.6) | -<br>0.000 | 2780.0<br>(23.2) | 3018.6<br>(23.4) | -<br>0.002 |
| 5+                                        | 2225.1<br>(27.6) | 1786.7<br>(26.3) | -<br>0.013 | 1062.4<br>(29.6) | 1482.5<br>(26.5) | -<br>0.031 | 3336.9<br>(27.9) | 3390.4<br>(26.3) | -<br>0.016 |
| <b>Number of Doctors (prior year) (%)</b> |                  |                  |            |                  |                  |            |                  |                  |            |
| 0                                         | 3355.1<br>(41.6) | 2775.9<br>(40.8) | -<br>0.007 | 1306.9<br>(36.4) | 2073.4<br>(37.0) | -<br>0.006 | 4815.2<br>(40.2) | 5033.7<br>(39.1) | -<br>0.012 |
| 1                                         | 2145.1<br>(26.6) | 1870.4<br>(27.5) | 0.009      | 955.4<br>(26.6)  | 1622.0<br>(28.9) | 0.024      | 3240.7<br>(27.1) | 3585.3<br>(27.8) | 0.007      |
| 2-4                                       | 2373.8<br>(29.4) | 2010.5<br>(29.6) | 0.002      | 1214.9<br>(33.8) | 1764.0<br>(31.5) | 0.023      | 3564.9<br>(29.8) | 3946.2<br>(30.6) | 0.008      |
| 5+                                        | 198.1<br>(2.5)   | 144.5<br>(2.1)   | -<br>0.003 | 117.4<br>(3.3)   | 143.5<br>(2.6)   | -<br>0.007 | 342.8<br>(2.9)   | 321.8<br>(2.5)   | -<br>0.004 |
| <b>Specialty clinics attended</b>         |                  |                  |            |                  |                  |            |                  |                  |            |

| Dexamethasone                                            | No Oxygen        |                  |       | Nasal Canula     |                  |       | Combined Cohort  |                  |       |
|----------------------------------------------------------|------------------|------------------|-------|------------------|------------------|-------|------------------|------------------|-------|
|                                                          | No               | Yes              | SMD   | No               | Yes              | SMD   | No               | Yes              | SMD   |
| Cardiology (%)                                           | 2009.2<br>(24.9) | 1732.1<br>(25.5) | 0.006 | 1097.7<br>(30.5) | 1680.2<br>(30.0) | -     | 3108.1<br>(26.0) | 3528.6<br>(27.4) | 0.014 |
| Coagulation (%)                                          | 137.3<br>(1.7)   | 116.6<br>(1.7)   | 0.000 | 44.3<br>(1.2)    | 82.1<br>(1.5)    | 0.002 | 192.2<br>(1.6)   | 214.1<br>(1.7)   | 0.001 |
| Pacemaker (%)                                            | 261.0<br>(3.2)   | 176.0<br>(2.6)   | -     | 161.9<br>(4.5)   | 191.6<br>(3.4)   | -     | 428.2<br>(3.6)   | 424.7<br>(3.3)   | -     |
| Dialysis (%)                                             | 117.2<br>(1.5)   | 115.0<br>(1.7)   | 0.002 | 99.4<br>(2.8)    | 94.2<br>(1.7)    | -     | 206.6<br>(1.7)   | 218.6<br>(1.7)   | 0.000 |
| Gastroenterology (%)                                     | 752.9<br>(9.3)   | 581.6<br>(8.6)   | -     | 332.9<br>(9.3)   | 528.2<br>(9.4)   | -     | 1147.9<br>(9.6)  | 1277.5<br>(9.9)  | -     |
| Hepatology (%)                                           | 276.9<br>(3.4)   | 193.4<br>(2.8)   | -     | 106.1<br>(3.0)   | 153.4<br>(2.7)   | -     | 426.1<br>(3.6)   | 359.0<br>(2.8)   | -     |
| Homeless (%)                                             | 619.4<br>(7.7)   | 362.9<br>(5.3)   | -     | 198.0<br>(5.5)   | 221.2<br>(3.9)   | -     | 817.4<br>(6.8)   | 596.1<br>(4.6)   | -     |
| <b>Co-Medications</b>                                    |                  |                  |       |                  |                  |       |                  |                  |       |
| Prophylactic Anticoagulants 1 <sup>st</sup> 48 hours (%) | 5781.6<br>(71.6) | 5062.6<br>(74.4) | 0.028 | 2604.7<br>(72.5) | 4253.2<br>(75.9) | 0.034 | 8665.8<br>(72.4) | 9589.0<br>(74.4) | 0.020 |
| Remdesivir, 1 <sup>st</sup> 48 hours (%)                 | 1867.5<br>(23.1) | 2555.9<br>(37.6) | 0.144 | 1522.2<br>(42.3) | 3510.2<br>(62.7) | 0.203 | 3664.1<br>(30.6) | 6050.4<br>(46.9) | 0.163 |
| <b>Laboratory values</b>                                 |                  |                  |       |                  |                  |       |                  |                  |       |
| Albumin, g/dL (%)                                        |                  |                  |       |                  |                  |       |                  |                  |       |
| 3.5 +                                                    | 2971.4<br>(36.8) | 2217.8<br>(32.6) | -     | 1039.5<br>(28.9) | 1501.5<br>(26.8) | -     | 4070.5<br>(34.0) | 3839.1<br>(29.8) | -     |
| 3 - 3.49                                                 | 2643.7<br>(32.8) | 2356.3<br>(34.6) | 0.019 | 1238.6<br>(34.5) | 1983.4<br>(35.4) | 0.009 | 3935.0<br>(32.9) | 4550.6<br>(35.3) | 0.024 |
| < 3                                                      | 2004.0<br>(24.8) | 1951.3<br>(28.7) | 0.039 | 1168.2<br>(32.5) | 1931.2<br>(34.5) | 0.020 | 3361.2<br>(28.1) | 3986.4<br>(30.9) | 0.028 |
| Missing                                                  | 453.0<br>(5.6)   | 276.0<br>(4.1)   | -     | 148.3<br>(4.1)   | 186.8<br>(3.3)   | -     | 596.9<br>(5.0)   | 510.9<br>(4.0)   | -     |
| Alanine aminotransferase, IU/L (%)                       |                  |                  |       |                  |                  |       |                  |                  |       |
| < 20                                                     | 2424.1<br>(30.0) | 1771.8<br>(26.1) | -     | 975.1<br>(27.1)  | 1310.1<br>(23.4) | -     | 3461.5<br>(28.9) | 3151.6<br>(24.5) | -     |
| 20 - 39                                                  | 3144.7<br>(39.0) | 2722.1<br>(40.0) | 0.011 | 1510.6<br>(42.0) | 2396.5<br>(42.8) | 0.007 | 4786.1<br>(40.0) | 5418.4<br>(42.0) | 0.020 |
| 40 +                                                     | 2098.6<br>(26.0) | 2136.3<br>(31.4) | 0.054 | 1006.2<br>(28.0) | 1789.2<br>(31.9) | 0.039 | 3195.2<br>(26.7) | 3995.4<br>(31.0) | 0.043 |
| Missing                                                  | 404.7<br>(5.0)   | 171.0<br>(2.5)   | -     | 102.7<br>(2.9)   | 107.1<br>(1.9)   | -     | 520.8<br>(4.4)   | 321.6<br>(2.5)   | -     |
| Asparate aminostransferase, IU/L (%)                     |                  |                  |       |                  |                  |       |                  |                  |       |
| < 20                                                     | 1758.6<br>(21.8) | 934.8<br>(13.7)  | -     | 502.6<br>(14.0)  | 572.1<br>(10.2)  | -     | 2285.0<br>(19.1) | 1586.6<br>(12.3) | -     |
| 20 - 39                                                  | 3510.0<br>(43.5) | 2998.7<br>(44.1) | 0.006 | 1591.8<br>(44.3) | 2437.9<br>(43.5) | 0.008 | 5309.3<br>(44.4) | 5767.2<br>(44.8) | 0.004 |
| 40 +                                                     | 2803.5<br>(34.7) | 2867.8<br>(42.2) | 0.074 | 1500.3<br>(41.7) | 2592.9<br>(46.3) | 0.045 | 4369.3<br>(36.5) | 5533.2<br>(42.9) | 0.064 |
| Creatinine, mg/dL (%)                                    |                  |                  |       |                  |                  |       |                  |                  |       |
| < 1.2                                                    | 3692.5<br>(45.7) | 2972.3<br>(43.7) | -     | 1471.4<br>(40.9) | 2501.2<br>(44.6) | -     | 5238.4<br>(43.8) | 5616.3<br>(43.6) | -     |
| 1.2 - 1.99                                               | 2892.6<br>(35.8) | 2574.4<br>(37.9) | 0.020 | 1399.8<br>(38.9) | 2118.8<br>(37.8) | -     | 4423.3<br>(37.0) | 4862.7<br>(37.7) | 0.008 |
| 2 +                                                      | 1387.3<br>(17.2) | 1224.0<br>(18.0) | 0.008 | 708.7<br>(19.7)  | 974.1<br>(17.4)  | -     | 2196.7<br>(18.4) | 2367.4<br>(18.4) | 0.000 |
| Missing                                                  | 99.6<br>(1.2)    | 30.6<br>(0.4)    | -     | 14.8<br>(0.4)    | 8.8<br>(0.2)     | -     | 105.2<br>(0.9)   | 40.6<br>(0.3)    | -     |
| Fibrosis-4 Index (%)                                     |                  |                  |       |                  |                  |       |                  |                  |       |
| < 1.45                                                   | 1753.2<br>(21.7) | 1263.6<br>(18.6) | -     | 507.7<br>(14.1)  | 791.1<br>(14.1)  | -     | 2289.3<br>(19.1) | 2087.1<br>(16.2) | -     |

| Dexamethasone                           | No Oxygen        |                  |            | Nasal Canula     |                  |            | Combined Cohort  |                   |            |
|-----------------------------------------|------------------|------------------|------------|------------------|------------------|------------|------------------|-------------------|------------|
|                                         | No               | Yes              | SMD        | No               | Yes              | SMD        | No               | Yes               | SMD        |
| 1.45 – 3.25                             | 3175.6<br>(39.3) | 2785.6<br>(41.0) | 0.016      | 1477.8<br>(41.1) | 2418.4<br>(43.2) | 0.021      | 4791.3<br>(40.0) | 5341.2<br>(41.4)  | 0.014      |
| 3.25 +                                  | 2686.8<br>(33.3) | 2565.5<br>(37.7) | 0.044      | 1502.2<br>(41.8) | 2276.9<br>(40.6) | 0.012      | 4308.2<br>(36.0) | 5107.3<br>(39.6)  | 0.036      |
| Missing                                 | 456.5<br>(5.7)   | 186.6<br>(2.7)   | -<br>0.029 | 107.0<br>(3.0)   | 116.5<br>(2.1)   | -<br>0.009 | 574.8<br>(4.8)   | 351.5<br>(2.7)    | -<br>0.021 |
| <b>Lactate, mmol/L (%)</b>              |                  |                  |            |                  |                  |            |                  |                   |            |
| <1.2                                    | 1079.9<br>(13.4) | 1033.2<br>(15.2) | 0.018      | 606.2<br>(16.9)  | 924.8<br>(16.5)  | -<br>0.004 | 1764.8<br>(14.8) | 2009.6<br>(15.6)  | -<br>0.008 |
| 1.2 - <2.0                              | 1932.7<br>(23.9) | 1911.1<br>(28.1) | 0.042      | 1028.3<br>(28.6) | 1747.7<br>(31.2) | 0.026      | 3020.2<br>(25.2) | 3732.9<br>(29.0)  | 0.037      |
| 2.0+                                    | 1091.5<br>(13.5) | 1077.5<br>(15.8) | 0.023      | 579.7<br>(16.1)  | 908.6<br>(16.2)  | 0.001      | 1626.1<br>(13.6) | 2027.5<br>(15.7)  | 0.021      |
| Missing                                 | 3968.0<br>(49.2) | 2779.5<br>(40.9) | -<br>0.083 | 1380.4<br>(38.4) | 2021.8<br>(36.1) | -<br>0.023 | 5552.5<br>(46.4) | 5117.0<br>(39.7)  | -<br>0.067 |
| <b>Platelet count per microL (%)</b>    |                  |                  |            |                  |                  |            |                  |                   |            |
| 150 or higher                           | 5456.1<br>(67.6) | 4504.8<br>(66.2) | -<br>0.014 | 2273.1<br>(63.2) | 3709.6<br>(66.2) | 0.030      | 7892.8<br>(66.0) | 8381.1<br>(65.0)  | -<br>0.009 |
| < 150                                   | 2542.9<br>(31.5) | 2288.1<br>(33.6) | 0.021      | 1312.2<br>(36.5) | 1885.7<br>(33.7) | 0.029      | 3988.7<br>(33.3) | 4482.4<br>(34.8)  | 0.014      |
| Missing                                 | 73.1<br>(0.9)    | 8.5<br>(0.1)     | -<br>0.008 | 9.3<br>(0.3)     | 7.7<br>(0.1)     | -<br>0.001 | 82.1<br>(0.7)    | 23.6<br>(0.2)     | -<br>0.005 |
| <b>Total bilirubin, mg/dL (%)</b>       |                  |                  |            |                  |                  |            |                  |                   |            |
| <1                                      | 5850.6<br>(72.5) | 5009.8<br>(73.7) | 0.012      | 2738.6<br>(76.2) | 4170.8<br>(74.4) | -<br>0.017 | 8779.4<br>(73.4) | 9524.9<br>(73.9)  | -<br>0.005 |
| 1 - 1.2                                 | 650.1<br>(8.1)   | 602.3<br>(8.9)   | 0.008      | 291.0<br>(8.1)   | 556.4<br>(9.9)   | 0.018      | 1004.1<br>(8.4)  | 1187.0<br>(9.2)   | 0.008      |
| 1.2 +                                   | 1163.5<br>(14.4) | 1014.1<br>(14.9) | 0.005      | 461.2<br>(12.8)  | 769.4<br>(13.7)  | 0.009      | 1664.4<br>(13.9) | 1857.2<br>(14.4)  | 0.005      |
| Missing                                 | 407.9<br>(5.1)   | 175.2<br>(2.6)   | -<br>0.025 | 103.9<br>(2.9)   | 106.3<br>(1.9)   | -<br>0.010 | 515.7<br>(4.3)   | 318.0<br>(2.5)    | -<br>0.018 |
| <b>White Blood Count per microL (%)</b> |                  |                  |            |                  |                  |            |                  |                   |            |
| 4-10                                    | 4515.2<br>(55.9) | 3361.8<br>(49.4) | -<br>0.065 | 1926.9<br>(53.6) | 2578.4<br>(46.0) | -<br>0.076 | 6641.3<br>(55.5) | 6266.6<br>(48.6)  | -<br>0.069 |
| <4                                      | 2095.3<br>(26.0) | 1972.6<br>(29.0) | 0.030      | 997.2<br>(27.7)  | 1699.2<br>(30.3) | 0.026      | 3139.3<br>(26.2) | 3812.3<br>(29.6)  | 0.033      |
| >10                                     | 1461.7<br>(18.1) | 1466.9<br>(21.6) | 0.035      | 670.6<br>(18.7)  | 1325.3<br>(23.7) | 0.050      | 2183.1<br>(18.2) | 2808.2<br>(21.8)  | 0.035      |
| C-reactive protein measured (%)         | 4320.2<br>(53.5) | 4113.1<br>(60.5) | 0.070      | 2174.7<br>(60.5) | 3484.6<br>(62.2) | 0.017      | 6674.9<br>(55.8) | 7810.0<br>(60.6)  | 0.048      |
| D-dimer measured (%)                    | 5648.2<br>(70.0) | 5406.0<br>(79.5) | 0.095      | 2876.9<br>(80.0) | 4655.2<br>(83.1) | 0.031      | 8791.6<br>(73.5) | 10350.8<br>(80.3) | 0.068      |
| <b>Vital Signs</b>                      |                  |                  |            |                  |                  |            |                  |                   |            |
| <b>Highest Temperature (F) (%)</b>      |                  |                  |            |                  |                  |            |                  |                   |            |
| < 99                                    | 3407.6<br>(42.2) | 2500.0<br>(36.8) | -<br>0.055 | 986.1<br>(27.4)  | 1746.3<br>(31.2) | 0.037      | 4466.1<br>(37.3) | 4443.3<br>(34.5)  | -<br>0.029 |
| 99 - 100                                | 1974.6<br>(24.5) | 1607.0<br>(23.6) | -<br>0.008 | 799.8<br>(22.3)  | 1331.8<br>(23.8) | 0.015      | 2919.2<br>(24.4) | 3106.8<br>(24.1)  | -<br>0.003 |
| 100 - 102                               | 1848.1<br>(22.9) | 1773.1<br>(26.1) | 0.032      | 1163.4<br>(32.4) | 1708.9<br>(30.5) | -<br>0.019 | 3077.0<br>(25.7) | 3567.9<br>(27.7)  | -<br>0.020 |
| 102 +                                   | 811.4<br>(10.1)  | 881.4<br>(13.0)  | 0.029      | 639.1<br>(17.8)  | 800.7<br>(14.3)  | -<br>0.035 | 1459.9<br>(12.2) | 1719.3<br>(13.3)  | -<br>0.011 |
| Missing                                 | 30.4<br>(0.4)    | 39.8<br>(0.6)    | -<br>0.002 | 6.1<br>(0.2)     | 15.2<br>(0.3)    | -<br>0.001 | 41.4<br>(0.3)    | 49.7<br>(0.4)     | -<br>0.000 |
| <b>Mean Arterial Pressure, mmHg (%)</b> |                  |                  |            |                  |                  |            |                  |                   |            |
| < 60                                    | 212.6<br>(2.6)   | 149.6<br>(2.2)   | -<br>0.004 | 97.1<br>(2.7)    | 106.8<br>(1.9)   | -<br>0.008 | 320.4<br>(2.7)   | 282.2<br>(2.2)    | -<br>0.005 |
| 60 – 69                                 | 1044.4<br>(12.9) | 827.9<br>(12.2)  | -<br>0.008 | 625.3<br>(17.4)  | 784.1<br>(14.0)  | -<br>0.034 | 1627.5<br>(13.6) | 1682.2<br>(13.1)  | -<br>0.006 |

| Dexamethasone                | No Oxygen        |                  |            | Nasal Canula     |                  |       | Combined Cohort  |                  |            |
|------------------------------|------------------|------------------|------------|------------------|------------------|-------|------------------|------------------|------------|
|                              | No               | Yes              | SMD        | No               | Yes              | SMD   | No               | Yes              | SMD        |
| 70 – 89                      | 5161.5<br>(63.9) | 4474.7<br>(65.8) | 0.018      | 2372.0<br>(66.0) | 3785.1<br>(67.6) | 0.016 | 7805.2<br>(65.2) | 8623.3<br>(66.9) | 0.017      |
| 90 +                         | 1632.3<br>(20.2) | 1325.1<br>(19.5) | -<br>0.007 | 495.4<br>(13.8)  | 915.0<br>(16.3)  | 0.025 | 2183.3<br>(18.2) | 2266.1<br>(17.6) | -<br>0.007 |
| Missing                      | 21.3<br>(0.3)    | 24.0<br>(0.4)    | 0.001      | 4.8<br>(0.1)     | 11.9<br>(0.2)    | 0.001 | 27.2<br>(0.2)    | 33.3<br>(0.3)    | 0.000      |
| Lowest Oxygen Saturation (%) |                  |                  |            |                  |                  |       |                  |                  |            |
| < 88                         | 269.7<br>(3.3)   | 412.6<br>(6.1)   | 0.027      | 386.2<br>(10.7)  | 709.6<br>(12.7)  | 0.019 | 643.0<br>(5.4)   | 1099.6<br>(8.5)  | 0.032      |
| 88 - 92                      | 2760.1<br>(34.2) | 3021.3<br>(44.4) | 0.102      | 1974.6<br>(54.9) | 3319.6<br>(59.2) | 0.043 | 4961.0<br>(41.5) | 6515.0<br>(50.6) | 0.091      |
| 93 - 95                      | 3462.4<br>(42.9) | 2437.4<br>(35.8) | -<br>0.071 | 967.7<br>(26.9)  | 1188.9<br>(21.2) | 0.057 | 4459.7<br>(37.3) | 3888.3<br>(30.2) | -<br>0.071 |
| 96 +                         | 1387.7<br>(17.2) | 776.4<br>(11.4)  | -<br>0.058 | 209.8<br>(5.8)   | 272.9<br>(4.9)   | 0.010 | 1651.6<br>(13.8) | 1106.9<br>(8.6)  | -<br>0.052 |
| Missing                      | 192.3<br>(2.4)   | 153.7<br>(2.3)   | -<br>0.001 | 56.4<br>(1.6)    | 111.8<br>(2.0)   | 0.004 | 248.3<br>(2.1)   | 277.2<br>(2.2)   | -<br>0.001 |



| Dexamethasone                             | No Oxygen        |                  |       | Nasal Canula     |                  |       | Combined Cohort  |                  |       |
|-------------------------------------------|------------------|------------------|-------|------------------|------------------|-------|------------------|------------------|-------|
|                                           | No               | Yes              | SMD   | No               | Yes              | SMD   | No               | Yes              | SMD   |
| Unknown                                   | 50.1<br>( 2.8)   | 86.0<br>( 2.8)   | 0.000 | 61.3<br>( 2.6)   | 125.0<br>( 2.9)  | 0.002 | 117.6<br>( 2.7)  | 211.0<br>( 2.8)  | 0.002 |
| 0                                         | 1222.6<br>(67.9) | 2048.0<br>(65.6) | -     | 1574.6<br>(67.7) | 2928.0<br>(66.8) | 0.009 | 3016.6<br>(68.2) | 4976.0<br>(66.3) | -     |
| 1-3                                       | 381.2<br>(21.2)  | 756.0<br>(24.2)  | 0.030 | 539.9<br>(23.2)  | 1055.0<br>(24.1) | 0.008 | 980.1<br>(22.1)  | 1811.0<br>(24.1) | 0.020 |
| 4-7                                       | 111.0<br>( 6.2)  | 182.0<br>( 5.8)  | -     | 117.8<br>( 5.1)  | 204.0<br>( 4.7)  | 0.004 | 250.1<br>( 5.7)  | 386.0<br>( 5.1)  | -     |
| 8+                                        | 35.1<br>( 1.9)   | 52.0<br>( 1.7)   | -     | 30.9<br>( 1.3)   | 71.0<br>( 1.6)   | 0.003 | 61.0<br>( 1.4)   | 123.0<br>( 1.6)  | 0.003 |
| <b>Comorbidities</b>                      |                  |                  |       |                  |                  |       |                  |                  |       |
| Myocardial Infarction (%)                 | 149.5<br>( 8.3)  | 228.0<br>( 7.3)  | -     | 249.5<br>(10.7)  | 354.0<br>( 8.1)  | 0.027 | 405.6<br>( 9.2)  | 582.0<br>( 7.8)  | -     |
| Congestive Heart Failure (%)              | 394.0<br>(21.9)  | 618.0<br>(19.8)  | -     | 561.2<br>(24.1)  | 898.0<br>(20.5)  | 0.037 | 988.4<br>(22.3)  | 1516.0<br>(20.2) | -     |
| Cerebrovascular Disease (%)               | 294.5<br>(16.4)  | 425.0<br>(13.6)  | -     | 415.9<br>(17.9)  | 657.0<br>(15.0)  | 0.029 | 747.4<br>(16.9)  | 1082.0<br>(14.4) | -     |
| Dementia (%)                              | 201.7<br>(11.2)  | 269.0<br>( 8.6)  | -     | 311.9<br>(13.4)  | 405.0<br>( 9.2)  | 0.042 | 540.9<br>(12.2)  | 674.0<br>( 9.0)  | -     |
| Chronic Obstructive Pulmonary Disease (%) | 489.4<br>(27.2)  | 888.0<br>(28.4)  | -     | 724.0<br>(31.1)  | 1416.0<br>(32.3) | 0.012 | 1297.3<br>(29.3) | 2304.0<br>(30.7) | -     |
| Rheumatoid Arthritis (%)                  | 32.4<br>( 1.8)   | 54.0<br>( 1.7)   | -     | 50.5<br>( 2.2)   | 71.0<br>( 1.6)   | 0.006 | 77.7<br>( 1.8)   | 125.0<br>( 1.7)  | -     |
| Peptic ulcer (%)                          | 27.7<br>( 1.5)   | 44.0<br>( 1.4)   | -     | 53.8<br>( 2.3)   | 85.0<br>( 1.9)   | 0.004 | 81.9<br>( 1.9)   | 129.0<br>( 1.7)  | -     |
| Liver disease, mild (%)                   | 204.4<br>(11.4)  | 327.0<br>(10.5)  | -     | 225.4<br>( 9.7)  | 435.0<br>( 9.9)  | 0.002 | 465.3<br>(10.5)  | 762.0<br>(10.2)  | -     |
| Diabetes, Uncomplicated (%)               | 873.7<br>(48.5)  | 1492.0<br>(47.8) | -     | 1125.6<br>(48.4) | 2149.0<br>(49.0) | 0.006 | 2210.3<br>(49.9) | 3641.0<br>(48.5) | -     |
| Diabetes, Complicated (%)                 | 565.8<br>(31.4)  | 922.0<br>(29.5)  | -     | 728.2<br>(31.3)  | 1314.0<br>(30.0) | 0.013 | 1416.1<br>(32.0) | 2236.0<br>(29.8) | -     |
| Hemi or paraplegia (%)                    | 39.8<br>( 2.2)   | 48.0<br>( 1.5)   | -     | 47.8<br>( 2.1)   | 78.0<br>( 1.8)   | 0.003 | 91.9<br>( 2.1)   | 126.0<br>( 1.7)  | -     |
| Renal disease (%)                         | 467.3<br>(26.0)  | 733.0<br>(23.5)  | -     | 684.9<br>(29.5)  | 1074.0<br>(24.5) | 0.050 | 1208.8<br>(27.3) | 1807.0<br>(24.1) | -     |
| Liver disease, moderate-severe (%)        | 29.3<br>( 1.6)   | 48.0<br>( 1.5)   | -     | 18.9<br>( 0.8)   | 46.0<br>( 1.0)   | 0.002 | 64.8<br>( 1.5)   | 94.0<br>( 1.3)   | -     |
| Metastatic cancer (%)                     | 40.7<br>( 2.3)   | 48.0<br>( 1.5)   | -     | 43.1<br>( 1.9)   | 80.0<br>( 1.8)   | 0.000 | 115.9<br>( 2.6)  | 128.0<br>( 1.7)  | -     |
| HIV (%)                                   | 30.5<br>( 1.7)   | 37.0<br>( 1.2)   | -     | 50.1<br>( 2.2)   | 39.0<br>( 0.9)   | 0.013 | 68.4<br>( 1.5)   | 76.0<br>( 1.0)   | -     |
| <b>Charlson Comorbidities Count (%)</b>   |                  |                  |       |                  |                  |       |                  |                  |       |
| 0                                         | 329.4<br>(18.3)  | 655.0<br>(21.0)  | 0.027 | 415.9<br>(17.9)  | 793.0<br>(18.1)  | 0.002 | 747.7<br>(16.9)  | 1448.0<br>(19.3) | 0.024 |
| 1-2                                       | 582.7<br>(32.4)  | 1047.0<br>(33.5) | 0.011 | 686.0<br>(29.5)  | 1441.0<br>(32.9) | 0.034 | 1435.8<br>(32.4) | 2488.0<br>(33.1) | 0.007 |
| 3-4                                       | 419.5<br>(23.3)  | 704.0<br>(22.5)  | -     | 552.6<br>(23.8)  | 1097.0<br>(25.0) | 0.013 | 1051.8<br>(23.8) | 1801.0<br>(24.0) | -     |
| 5+                                        | 468.5<br>(26.0)  | 718.0<br>(23.0)  | -     | 670.0<br>(28.8)  | 1052.0<br>(24.0) | 0.048 | 1190.0<br>(26.9) | 1770.0<br>(23.6) | -     |
| <b>Number of Doctors (prior year) (%)</b> |                  |                  |       |                  |                  |       |                  |                  |       |
| 0                                         | 739.6<br>(41.1)  | 1291.0<br>(41.3) | 0.002 | 834.3<br>(35.9)  | 1639.0<br>(37.4) | 0.015 | 1756.5<br>(39.7) | 2930.0<br>(39.0) | -     |
| 1                                         | 502.8<br>(27.9)  | 872.0<br>(27.9)  | 0.000 | 633.0<br>(27.2)  | 1268.0<br>(28.9) | 0.017 | 1170.1<br>(26.4) | 2140.0<br>(28.5) | 0.021 |
| 2-4                                       | 512.8<br>(28.5)  | 901.0<br>(28.8)  | 0.004 | 785.9<br>(33.8)  | 1368.0<br>(31.2) | 0.026 | 1359.5<br>(30.7) | 2269.0<br>(30.2) | -     |
| 5+                                        | 44.9<br>( 2.5)   | 60.0<br>( 1.9)   | -     | 71.4<br>( 3.1)   | 108.0<br>( 2.5)  | 0.006 | 139.2<br>( 3.1)  | 168.0<br>( 2.2)  | -     |
| <b>Specialty clinics attended</b>         |                  |                  |       |                  |                  |       |                  |                  |       |

| Dexamethasone                                            | No Oxygen        |                  |       | Nasal Canula     |                  |       | Combined Cohort  |                  |       |
|----------------------------------------------------------|------------------|------------------|-------|------------------|------------------|-------|------------------|------------------|-------|
|                                                          | No               | Yes              | SMD   | No               | Yes              | SMD   | No               | Yes              | SMD   |
| Cardiology (%)                                           | 441.0<br>(24.5)  | 809.0<br>(25.9)  | 0.014 | 709.1<br>(30.5)  | 1262.0<br>(28.8) | -     | 1159.7<br>(26.2) | 2071.0<br>(27.6) | 0.014 |
| Coagulation (%)                                          | 28.7<br>(1.6)    | 59.0<br>(1.9)    | 0.003 | 23.2<br>(1.0)    | 58.0<br>(1.3)    | 0.003 | 64.5<br>(1.5)    | 117.0<br>(1.6)   | 0.001 |
| Pacemaker (%)                                            | 54.2<br>(3.0)    | 81.0<br>(2.6)    | -     | 95.8<br>(4.1)    | 127.0<br>(2.9)   | 0.012 | 145.2<br>(3.3)   | 208.0<br>(2.8)   | -     |
| Dialysis (%)                                             | 24.2<br>(1.3)    | 29.0<br>(0.9)    | -     | 61.1<br>(2.6)    | 53.0<br>(1.2)    | 0.014 | 75.6<br>(1.7)    | 82.0<br>(1.1)    | -     |
| Gastroenterology (%)                                     | 174.2<br>(9.7)   | 292.0<br>(9.3)   | -     | 228.9<br>(9.8)   | 434.0<br>(9.9)   | 0.001 | 448.6<br>(10.1)  | 726.0<br>(9.7)   | -     |
| Hepatology (%)                                           | 50.6<br>(2.8)    | 72.0<br>(2.3)    | -     | 66.8<br>(2.9)    | 109.0<br>(2.5)   | 0.004 | 122.8<br>(2.8)   | 181.0<br>(2.4)   | -     |
| Homeless (%)                                             | 97.2<br>(5.4)    | 124.0<br>(4.0)   | -     | 120.5<br>(5.2)   | 139.0<br>(3.2)   | 0.020 | 199.0<br>(4.5)   | 263.0<br>(3.5)   | -     |
| <b>Co-Medications</b>                                    |                  |                  |       |                  |                  |       |                  |                  |       |
| Prophylactic Anticoagulants 1 <sup>st</sup> 48 hours (%) | 1351.7<br>(75.1) | 2375.0<br>(76.0) | 0.009 | 1726.9<br>(74.3) | 3404.0<br>(77.7) | 0.034 | 3315.3<br>(74.9) | 5779.0<br>(77.0) | 0.021 |
| Remdesivir, 1 <sup>st</sup> 48 hours (%)                 | 800.6<br>(44.5)  | 2115.0<br>(67.7) | 0.232 | 1275.1<br>(54.9) | 3302.0<br>(75.3) | 0.205 | 2391.0<br>(54.0) | 5417.0<br>(72.2) | 0.181 |
| <b>Laboratory values</b>                                 |                  |                  |       |                  |                  |       |                  |                  |       |
| Albumin, g/dL (%)                                        |                  |                  |       |                  |                  |       |                  |                  |       |
| 3.5 +                                                    | 542.4<br>(30.1)  | 916.0<br>(29.3)  | -     | 632.6<br>(27.2)  | 1122.0<br>(25.6) | 0.016 | 1291.8<br>(29.2) | 2038.0<br>(27.1) | -     |
| 3 - 3.49                                                 | 642.2<br>(35.7)  | 1116.0<br>(35.7) | 0.000 | 826.5<br>(35.6)  | 1581.0<br>(36.1) | 0.005 | 1479.2<br>(33.4) | 2697.0<br>(35.9) | 0.025 |
| < 3                                                      | 539.9<br>(30.0)  | 971.0<br>(31.1)  | 0.011 | 790.4<br>(34.0)  | 1550.0<br>(35.4) | 0.014 | 1493.7<br>(33.8) | 2521.0<br>(33.6) | -     |
| Missing                                                  | 75.4<br>(4.2)    | 121.0<br>(3.9)   | -     | 75.0<br>(3.2)    | 130.0<br>(3.0)   | 0.003 | 160.6<br>(3.6)   | 251.0<br>(3.3)   | -     |
| Alanine aminotransferase, IU/L (%)                       |                  |                  |       |                  |                  |       |                  |                  |       |
| < 20                                                     | 492.9<br>(27.4)  | 633.0<br>(20.3)  | -     | 556.7<br>(23.9)  | 931.0<br>(21.2)  | 0.027 | 1117.4<br>(25.2) | 1564.0<br>(20.8) | -     |
| 20 - 39                                                  | 759.2<br>(42.2)  | 1348.0<br>(43.1) | 0.010 | 1010.7<br>(43.5) | 1873.0<br>(42.7) | 0.007 | 1883.3<br>(42.6) | 3221.0<br>(42.9) | 0.003 |
| 40 +                                                     | 515.2<br>(28.6)  | 1105.0<br>(35.4) | 0.067 | 724.9<br>(31.2)  | 1526.0<br>(34.8) | 0.036 | 1351.1<br>(30.5) | 2631.0<br>(35.0) | 0.045 |
| Missing                                                  | 32.7<br>(1.8)    | 38.0<br>(1.2)    | -     | 32.3<br>(1.4)    | 53.0<br>(1.2)    | 0.002 | 73.5<br>(1.7)    | 91.0<br>(1.2)    | -     |
| Asparate aminostransferase, IU/L (%)                     |                  |                  |       |                  |                  |       |                  |                  |       |
| < 20                                                     | 232.9<br>(12.9)  | 287.0<br>(9.2)   | 0.038 | 227.3<br>(9.8)   | 331.0<br>(7.6)   | 0.022 | 480.6<br>(10.9)  | 618.0<br>(8.2)   | -     |
| 20 - 39                                                  | 837.7<br>(46.5)  | 1344.0<br>(43.0) | 0.035 | 1043.5<br>(44.9) | 1848.0<br>(42.2) | 0.027 | 2013.5<br>(45.5) | 3192.0<br>(42.5) | -     |
| 40 +                                                     | 729.4<br>(40.5)  | 1493.0<br>(47.8) | 0.073 | 1053.8<br>(45.3) | 2204.0<br>(50.3) | 0.050 | 1931.2<br>(43.6) | 3697.0<br>(49.2) | 0.056 |
| Creatinine, mg/dL (%)                                    |                  |                  |       |                  |                  |       |                  |                  |       |
| < 1.2                                                    | 774.8<br>(43.0)  | 1427.0<br>(45.7) | 0.026 | 947.0<br>(40.7)  | 2015.0<br>(46.0) | 0.052 | 1816.1<br>(41.0) | 3442.0<br>(45.9) | 0.048 |
| 1.2 - 1.99                                               | 695.2<br>(38.6)  | 1235.0<br>(39.5) | 0.009 | 928.6<br>(39.9)  | 1655.0<br>(37.8) | 0.022 | 1742.2<br>(39.4) | 2890.0<br>(38.5) | -     |
| 2 +                                                      | 326.3<br>(18.1)  | 443.0<br>(14.2)  | -     | 447.4<br>(19.2)  | 706.0<br>(16.1)  | 0.031 | 840.9<br>(19.0)  | 1149.0<br>(15.3) | -     |
| Missing                                                  | 3.7<br>(0.2)     | 19.0<br>(0.6)    | 0.004 | 1.5<br>(0.1)     | 7.0<br>(0.2)     | 0.001 | 26.1<br>(0.6)    | 26.0<br>(0.3)    | -     |
| Fibrosis-4 Index (%)                                     |                  |                  |       |                  |                  |       |                  |                  |       |
| < 1.45                                                   | 327.4<br>(18.2)  | 539.0<br>(17.3)  | 0.009 | 302.8<br>(13.0)  | 599.0<br>(13.7)  | 0.006 | 667.6<br>(15.1)  | 1138.0<br>(15.2) | 0.001 |



| Dexamethasone                    | No Oxygen        |                  |       | Nasal Canula     |                  |       | Combined Cohort  |                  |       |
|----------------------------------|------------------|------------------|-------|------------------|------------------|-------|------------------|------------------|-------|
|                                  | No               | Yes              | SMD   | No               | Yes              | SMD   | No               | Yes              | SMD   |
| 1.45 – 3.25                      | 743.3<br>(41.3)  | 1313.0<br>(42.0) | 0.007 | 990.9<br>(42.6)  | 1923.0<br>(43.9) | 0.012 | 1836.7<br>(41.5) | 3236.0<br>(43.1) | 0.016 |
| 3.25 +                           | 683.9<br>(38.0)  | 1226.0<br>(39.2) | 0.013 | 996.3<br>(42.9)  | 1800.0<br>(41.1) | 0.018 | 1834.5<br>(41.5) | 3026.0<br>(40.3) | -     |
| Missing                          | 45.5<br>(2.5)    | 46.0<br>(1.5)    | -     | 34.6<br>(1.5)    | 61.0<br>(1.4)    | -     | 86.4<br>(2.0)    | 107.0<br>(1.4)   | -     |
| Lactate, mmol/L (%)              |                  |                  |       |                  |                  |       |                  |                  |       |
| <1.2                             | 299.2<br>(16.6)  | 482.0<br>(15.4)  | -     | 404.8<br>(17.4)  | 707.0<br>(16.1)  | 0.013 | 718.7<br>(16.2)  | 1189.0<br>(15.8) | -     |
| 1.2 - <2.0                       | 495.8<br>(27.5)  | 929.0<br>(29.7)  | 0.022 | 717.7<br>(30.9)  | 1423.0<br>(32.5) | 0.016 | 1307.9<br>(29.6) | 2352.0<br>(31.3) | 0.018 |
| 2.0+                             | 276.8<br>(15.4)  | 564.0<br>(18.1)  | 0.027 | 376.3<br>(16.2)  | 727.0<br>(16.6)  | 0.004 | 672.5<br>(15.2)  | 1291.0<br>(17.2) | 0.020 |
| Missing                          | 728.3<br>(40.5)  | 1149.0<br>(36.8) | -     | 825.9<br>(35.5)  | 1526.0<br>(34.8) | -     | 1726.1<br>(39.0) | 2675.0<br>(35.6) | -     |
| Platelet count per microL (%)    |                  |                  |       |                  |                  |       |                  |                  |       |
| 150 or higher                    | 1175.4<br>(65.3) | 2099.0<br>(67.2) | 0.019 | 1500.3<br>(64.5) | 2962.0<br>(67.6) | 0.030 | 2834.3<br>(64.0) | 5061.0<br>(67.4) | 0.034 |
| < 150                            | 617.5<br>(34.3)  | 1019.0<br>(32.6) | -     | 823.2<br>(35.4)  | 1416.0<br>(32.3) | 0.031 | 1579.1<br>(35.7) | 2435.0<br>(32.4) | -     |
| Missing                          | 7.1<br>(0.4)     | 6.0<br>(0.2)     | -     | 1.2<br>(0.0)     | 5.0<br>(0.1)     | -     | 11.9<br>(0.3)    | 11.0<br>(0.1)    | -     |
| Total bilirubin, mg/dL (%)       |                  |                  |       |                  |                  |       |                  |                  |       |
| <1                               | 1336.7<br>(74.3) | 2299.0<br>(73.6) | 0.007 | 1793.5<br>(77.2) | 3219.0<br>(73.4) | 0.037 | 3313.1<br>(74.9) | 5518.0<br>(73.5) | -     |
| 1 - 1.2                          | 163.8<br>(9.1)   | 295.0<br>(9.4)   | 0.003 | 181.8<br>(7.8)   | 467.0<br>(10.7)  | 0.028 | 395.4<br>(8.9)   | 762.0<br>(10.2)  | 0.012 |
| 1.2 +                            | 266.5<br>(14.8)  | 473.0<br>(15.1)  | 0.003 | 312.8<br>(13.5)  | 640.0<br>(14.6)  | 0.011 | 620.3<br>(14.0)  | 1113.0<br>(14.8) | 0.008 |
| Missing                          | 33.0<br>(1.8)    | 57.0<br>(1.8)    | -     | 36.4<br>(1.6)    | 57.0<br>(1.3)    | -     | 96.4<br>(2.2)    | 114.0<br>(1.5)   | -     |
| White Blood Count per microL (%) |                  |                  |       |                  |                  |       |                  |                  |       |
| 4-10                             | 937.2<br>(52.1)  | 1443.0<br>(46.2) | 0.059 | 1198.0<br>(51.5) | 1890.0<br>(43.1) | 0.084 | 2251.8<br>(50.9) | 3333.0<br>(44.4) | -     |
| <4                               | 512.2<br>(28.5)  | 915.0<br>(29.3)  | 0.008 | 655.4<br>(28.2)  | 1344.0<br>(30.7) | 0.025 | 1271.5<br>(28.7) | 2259.0<br>(30.1) | 0.014 |
| >10                              | 350.6<br>(19.5)  | 766.0<br>(24.5)  | 0.050 | 471.2<br>(20.3)  | 1149.0<br>(26.2) | 0.059 | 902.0<br>(20.4)  | 1915.0<br>(25.5) | 0.051 |
| C-reactive protein measured (%)  | 1092.7<br>(60.7) | 1947.0<br>(62.3) | 0.016 | 1472.5<br>(63.3) | 2793.0<br>(63.7) | 0.004 | 2725.4<br>(61.6) | 4740.0<br>(63.1) | 0.016 |
| D-dimer measured (%)             | 1430.4<br>(79.5) | 2635.0<br>(84.3) | 0.049 | 1925.8<br>(82.8) | 3682.0<br>(84.0) | 0.012 | 3590.4<br>(81.1) | 6317.0<br>(84.1) | 0.030 |
| <b>Vital Signs</b>               |                  |                  |       |                  |                  |       |                  |                  |       |
| Highest Temperature (F) (%)      |                  |                  |       |                  |                  |       |                  |                  |       |
| < 99                             | 652.8<br>(36.3)  | 1071.0<br>(34.3) | 0.020 | 602.2<br>(25.9)  | 1409.0<br>(32.1) | 0.062 | 1392.3<br>(31.5) | 2480.0<br>(33.0) | 0.016 |
| 99 - 100                         | 443.5<br>(24.6)  | 752.0<br>(24.1)  | 0.006 | 489.9<br>(21.1)  | 1026.0<br>(23.4) | 0.023 | 1007.8<br>(22.8) | 1778.0<br>(23.7) | 0.009 |
| 100 - 102                        | 439.7<br>(24.4)  | 888.0<br>(28.4)  | 0.040 | 776.7<br>(33.4)  | 1316.0<br>(30.0) | 0.034 | 1325.2<br>(29.9) | 2204.0<br>(29.4) | -     |
| 102 +                            | 247.6<br>(13.8)  | 397.0<br>(12.7)  | -     | 451.6<br>(19.4)  | 614.0<br>(14.0)  | -     | 673.5<br>(15.2)  | 1011.0<br>(13.5) | -     |
| Missing                          | 16.4<br>(0.9)    | 16.0<br>(0.5)    | -     | 4.1<br>(0.2)     | 18.0<br>(0.4)    | -     | 26.4<br>(0.6)    | 34.0<br>(0.5)    | -     |
| Mean Arterial Pressure, mmHg (%) |                  |                  |       |                  |                  |       |                  |                  |       |
| < 60                             | 51.8<br>(2.9)    | 55.0<br>(1.8)    | 0.011 | 45.7<br>(2.0)    | 74.0<br>(1.7)    | 0.003 | 93.5<br>(2.1)    | 129.0<br>(1.7)   | -     |
| 60 – 69                          | 224.7<br>(12.5)  | 342.0<br>(10.9)  | -     | 410.9<br>(17.7)  | 550.0<br>(12.5)  | -     | 630.6<br>(14.3)  | 892.0<br>(11.9)  | -     |

| Dexamethasone                | No Oxygen        |                  |            | Nasal Canula     |                  |            | Combined Cohort  |                  |            |
|------------------------------|------------------|------------------|------------|------------------|------------------|------------|------------------|------------------|------------|
|                              | No               | Yes              | SMD        | No               | Yes              | SMD        | No               | Yes              | SMD        |
| 70 – 89                      | 1182.3<br>(65.7) | 2092.0<br>(67.0) | 0.013      | 1546.3<br>(66.5) | 2998.0<br>(68.4) | 0.019      | 2968.3<br>(67.1) | 5090.0<br>(67.8) | 0.007      |
| 90 +                         | 330.9<br>(18.4)  | 625.0<br>(20.0)  | 0.016      | 317.8<br>(13.7)  | 747.0<br>(17.0)  | 0.034      | 716.7<br>(16.2)  | 1372.0<br>(18.3) | 0.021      |
| Missing                      | 10.3<br>(0.6)    | 10.0<br>(0.3)    | -<br>0.003 | 3.8<br>(0.2)     | 14.0<br>(0.3)    | -<br>0.002 | 16.2<br>(0.4)    | 24.0<br>(0.3)    | -<br>0.000 |
| Lowest Oxygen Saturation (%) |                  |                  |            |                  |                  |            |                  |                  |            |
| < 88                         | 98.5<br>(5.5)    | 319.0<br>(10.2)  | 0.047      | 274.2<br>(11.8)  | 622.0<br>(14.2)  | 0.024      | 383.4<br>(8.7)   | 941.0<br>(12.5)  | 0.039      |
| 88 - 92                      | 850.7<br>(47.3)  | 1660.0<br>(53.1) | 0.059      | 1355.9<br>(58.3) | 2702.0<br>(61.6) | 0.033      | 2262.9<br>(51.1) | 4362.0<br>(58.1) | 0.070      |
| 93 - 95                      | 629.6<br>(35.0)  | 863.0<br>(27.6)  | -<br>0.073 | 566.8<br>(24.4)  | 794.0<br>(18.1)  | -<br>0.063 | 1357.3<br>(30.7) | 1657.0<br>(22.1) | -<br>0.086 |
| 96 +                         | 172.2<br>(9.6)   | 216.0<br>(6.9)   | -<br>0.026 | 93.3<br>(4.0)    | 165.0<br>(3.8)   | -<br>0.002 | 315.4<br>(7.1)   | 381.0<br>(5.1)   | -<br>0.021 |
| Missing                      | 49.2<br>(2.7)    | 66.0<br>(2.1)    | -<br>0.006 | 34.4<br>(1.5)    | 100.0<br>(2.3)   | -<br>0.008 | 106.3<br>(2.4)   | 166.0<br>(2.2)   | -<br>0.002 |

**Supplemental Table E2. Sensitivity analyses estimating the average treatment effect in the treated population (ATT) in weighted Cox proportional hazards models for 90-day mortality associated with early dexamethasone exposure in patients hospitalized for COVID-19 not on IRS**

|                                                        | <b>No oxygen supplementation</b> | <b>Nasal cannula</b> | <b>Combined group: no oxygen plus NC</b> |
|--------------------------------------------------------|----------------------------------|----------------------|------------------------------------------|
|                                                        | <b>HR (95% CI)</b>               | <b>HR (95% CI)</b>   | <b>HR (95% CI)</b>                       |
| <b>Primary analysis</b>                                | 1.99 (1.60-2.48)                 | 1.04 (0.78-1.39)     | 1.60 (1.32-1.94)                         |
| <b>Sensitivity and subgroup analyses</b>               |                                  |                      |                                          |
| Restricted to positive SARS-CoV-2 test within 24 hours | 1.50 (1.04-2.17)                 | 1.30 (0.90-1.88)     | 1.39 (1.03-1.88)                         |
| Restricted to positive SARS-CoV-2 test within 48 hours | 1.52 (1.05-2.21)                 | 1.32 (0.92-1.90)     | 1.43 (1.06-1.92)                         |
| Any systemic corticosteroids                           | 1.90 (1.53-2.36)                 | 1.15 (0.88-1.52)     | 1.58 (1.31-1.90)                         |
| Excluding patients admitted to ICU in initial 48 hours | 1.23 (0.88-1.74)                 | 1.28 (0.88-1.86)     | 1.27 (0.96-1.67)                         |
| Restricted to patients age 70 and older                | 1.45 (1.05-2.01)                 | 1.33 (0.93-1.89)     | 1.45 (1.11-1.91)                         |

Models present the ATT (average treatment effect in treated population).

CI = confidence interval

HR = hazard ratio

IRS = intensive respiratory support

**Supplemental Table E3. Sensitivity analyses with unweighted, multivariable Cox proportional hazards models for 90-day mortality associated with early dexamethasone exposure in patients hospitalized for COVID-19 not on IRS**

|                                                        | <b>No oxygen supplementation</b> | <b>Nasal cannula</b> | <b>Combined group: no oxygen plus NC</b> |
|--------------------------------------------------------|----------------------------------|----------------------|------------------------------------------|
|                                                        | <b>HR (95% CI)</b>               | <b>HR (95% CI)</b>   | <b>HR (95% CI)</b>                       |
| <b>Primary analysis</b>                                | 1.75 (1.47-2.07)                 | 1.31 (1.08-1.60)     | 1.63 (1.44-1.85)                         |
| <b>Sensitivity and subgroup analyses</b>               |                                  |                      |                                          |
| Restricted to positive SARS-CoV-2 test within 24 hours | 1.86 (1.55-2.23)                 | 1.33 (1.08-1.64)     | 1.69 (1.48-1.93)                         |
| Restricted to positive SARS-CoV-2 test within 48 hours | 1.89 (1.58-2.26)                 | 1.33 (1.08-1.63)     | 1.70 (1.49-1.94)                         |
| Any systemic corticosteroids                           | 1.69 (1.44-1.99)                 | 1.33 (1.09-1.61)     | 1.61 (1.43-1.82)                         |
| Excluding patients admitted to ICU in initial 48 hours | 1.63 (1.35-1.98)                 | 1.18 (0.96-1.44)     | 1.49 (1.30-1.70)                         |
| Restricted to patients age 70 and older                | 1.76 (1.46-2.12)                 | 1.31 (1.06-1.60)     | 1.61 (1.41-1.84)                         |

CI = confidence interval

HR = hazard ratio

IRS = intensive respiratory support

**Supplemental Table E4. STROBE Checklist of items for cohort studies**

|                              | <b>Item No</b> | <b>Recommendation</b>                                                                                                                                                                | <b>Section/Paragraph</b>                                                                 |
|------------------------------|----------------|--------------------------------------------------------------------------------------------------------------------------------------------------------------------------------------|------------------------------------------------------------------------------------------|
| <b>Title and abstract</b>    | 1              | (a) Indicate the study's design with a commonly used term in the title or the abstract                                                                                               | Abstract: Methods                                                                        |
|                              |                | (b) Provide in the abstract an informative and balanced summary of what was done and what was found                                                                                  | Abstract: Methods, Findings, Interpretation                                              |
| <b>Introduction</b>          |                |                                                                                                                                                                                      |                                                                                          |
| Background/rationale         | 2              | Explain the scientific background and rationale for the investigation being reported                                                                                                 | Introduction: Paragraphs 1-2                                                             |
| Objectives                   | 3              | State specific objectives, including any prespecified hypotheses                                                                                                                     | Introduction: Paragraph 3                                                                |
| <b>Methods</b>               |                |                                                                                                                                                                                      |                                                                                          |
| Study design                 | 4              | Present key elements of study design early in the paper                                                                                                                              | Methods: Paragraph 1                                                                     |
| Setting                      | 5              | Describe the setting, locations, and relevant dates, including periods of recruitment, exposure, follow-up, and data collection                                                      | Methods: Paragraph 1                                                                     |
| Participants                 | 6              | (a) Give the eligibility criteria, and the sources and methods of selection of participants. Describe methods of follow-up                                                           | Methods: Paragraphs 1-2                                                                  |
|                              |                | (b) For matched studies, give matching criteria and number of exposed and unexposed                                                                                                  | N/A                                                                                      |
| Variables                    | 7              | Clearly define all outcomes, exposures, predictors, potential confounders, and effect modifiers. Give diagnostic criteria, if applicable                                             | Methods: Paragraphs 3-6                                                                  |
| Data sources/<br>measurement | 8*             | For each variable of interest, give sources of data and details of methods of assessment (measurement). Describe comparability of assessment methods if there is more than one group | Methods: Paragraphs 3-6                                                                  |
| Bias                         | 9              | Describe any efforts to address potential sources of bias                                                                                                                            | Methods: Paragraphs 7-8                                                                  |
| Study size                   | 10             | Explain how the study size was arrived at                                                                                                                                            | All hospitalized COVID+ patients with at least 48h stay, concatenating length of stay to |

|                        |     |                                                                                                                                                                                                   |                                                            |
|------------------------|-----|---------------------------------------------------------------------------------------------------------------------------------------------------------------------------------------------------|------------------------------------------------------------|
|                        |     |                                                                                                                                                                                                   | include emergency department/observational status          |
| Quantitative variables | 11  | Explain how quantitative variables were handled in the analyses. If applicable, describe which groupings were chosen and why                                                                      | Methods: paragraphs 4, 6, Table 2, Supplemental Table 1    |
| Statistical methods    | 12  | (a) Describe all statistical methods, including those used to control for confounding                                                                                                             | Methods: paragraphs 7, 8                                   |
|                        |     | (b) Describe any methods used to examine subgroups and interactions                                                                                                                               | Methods: paragraph 9                                       |
|                        |     | (c) Explain how missing data were addressed                                                                                                                                                       | Methods: paragraph 8, Table 2, Supplemental Table 1        |
|                        |     | (d) If applicable, explain how loss to follow-up was addressed                                                                                                                                    | N/A                                                        |
|                        |     | (e) Describe any sensitivity analyses                                                                                                                                                             | Methods: paragraph 9                                       |
| <b>Results</b>         |     |                                                                                                                                                                                                   |                                                            |
| Participants           | 13* | (a) Report numbers of individuals at each stage of study—eg numbers potentially eligible, examined for eligibility, confirmed eligible, included in the study, completing follow-up, and analysed | Methods: paragraph 1-2<br>Results: paragraph 1<br>Figure 1 |
|                        |     | (b) Give reasons for non-participation at each stage                                                                                                                                              | Methods: paragraph 2<br>Figure 1                           |
|                        |     | (c) Consider use of a flow diagram                                                                                                                                                                | Figure 1                                                   |
| Descriptive data       | 14* | (a) Give characteristics of study participants (eg demographic, clinical, social) and information on exposures and potential confounders                                                          | Results: paragraphs 1-2<br>Table 1                         |
|                        |     | (b) Indicate number of participants with missing data for each variable of interest                                                                                                               | Table 2,<br>Supplemental Table 1                           |
|                        |     | (c) Summarise follow-up time (eg, average and total amount)                                                                                                                                       | Figure 2                                                   |
| Outcome data           | 15* | Report numbers of outcome events or summary measures over time                                                                                                                                    | Results: paragraph 2<br>Table 1, Figure 2,<br>Figure 3     |

|                          |    |                                                                                                                                                                                                              |                                                             |
|--------------------------|----|--------------------------------------------------------------------------------------------------------------------------------------------------------------------------------------------------------------|-------------------------------------------------------------|
| Main results             | 16 | (a) Give unadjusted estimates and, if applicable, confounder-adjusted estimates and their precision (eg, 95% confidence interval). Make clear which confounders were adjusted for and why they were included | Results: paragraph 2<br>Results: paragraphs 4, 5<br>Table 3 |
|                          |    | (b) Report category boundaries when continuous variables were categorized                                                                                                                                    | Table 2 and Supplemental Table 1                            |
|                          |    | (c) If relevant, consider translating estimates of relative risk into absolute risk for a meaningful time period                                                                                             |                                                             |
| Other analyses           | 17 | Report other analyses done—eg analyses of subgroups and interactions, and sensitivity analyses                                                                                                               | Results: paragraph 6                                        |
| <b>Discussion</b>        |    |                                                                                                                                                                                                              |                                                             |
| Key results              | 18 | Summarise key results with reference to study objectives                                                                                                                                                     | Discussion: paragraph 1-2                                   |
| Limitations              | 19 | Discuss limitations of the study, taking into account sources of potential bias or imprecision. Discuss both direction and magnitude of any potential bias                                                   | Discussion: paragraph 7                                     |
| Interpretation           | 20 | Give a cautious overall interpretation of results considering objectives, limitations, multiplicity of analyses, results from similar studies, and other relevant evidence                                   | Discussion: paragraphs 1, 2, 3, 5, 6                        |
| Generalisability         | 21 | Discuss the generalisability (external validity) of the study results                                                                                                                                        | Discussion: paragraph 3, 4, 5, 6                            |
| <b>Other information</b> |    |                                                                                                                                                                                                              |                                                             |
| Funding                  | 22 | Give the source of funding and the role of the funders for the present study and, if applicable, for the original study on which the present article is based                                                | Metadata                                                    |

\*Give information separately for exposed and unexposed groups
